# Supplementary material for: Hydrological effects of evapotranspiration in the Qilian Mountains forest belt
Source: Copernicus journal article supplement (doi:10.5194/hess-2022-375), 2023-01-16
Supplement: Supplementary file [file hess-2022-375-AC2-supplement.pdf]

## RESPONSE TO REVIEWER2

Thank you very much for taking the time to provide valuable feedback on our manuscript. Your input is highly significant in improving the quality of our manuscript.

To demonstrate our appreciation for your feedback, we have diligently addressed each of your comments and made significant revisions, particularly in the following areas. We rearranged the logic of the manuscript and added data, especially for the xylem water of Qinghai spruce. The water vapor recirculation part is clearly expounded, and each parameter is described in detail. We have carried out uncertainty analysis. We have re-landscaped all the images throughout the article and improved their clarity. We have changed the language to make it easier for native English speakers to make valuable suggestions. We have placed the revised manuscript PDF at the end of the document. **The red bolded words, sentences, and subsections in the manuscript represent our editing changes.**

We sincerely hope that you will recognize the genuine effort we have put into this manuscript and give us another opportunity to review and incorporate your suggested modifications.

### **General comment**

The authors of this manuscript aimed to assess the role of transpiration, compared to other water fluxes, in a spruce forest in the Qilian Mountains, China. In their analyses, the authors exploited the usefulness of stable isotopes of hydrogen and oxygen to investigate water fluxes in the soil-plant-atmosphere continuum.

**Response:** Thank you for your affirmation of our work. It serves as an ongoing motivation for us to continue our research in the current direction. We greatly appreciate your support and encouragement.

Although this manuscript may be interesting for the readers of Hydrology and Earth System Sciences, the current version presents a poor description of the sampling

approaches and laboratory methodologies, and the dataset does not seem sufficient to support the main findings (only a growing season was considered, and the authors collected only 7 xylem samples). Furthermore, the authors should have determined the uncertainty in their estimates, in order to assess the impacts on the main results.

**Response:** This issue indeed serves as a critical weakness in our manuscript. Therefore, in this revised version, we have made several adjustments. Firstly, we have adjusted the research timeframe to cover two growing seasons from 2018 to 2019. Additionally, we have increased the number of sampling points to four at different vertical heights and expanded the number of wood water samples to 404. Furthermore, we have conducted an uncertainty analysis (Section 5.2) to assess the uncertainties associated with our methodology.

In terms of presentation quality, the manuscript would benefit from a thorough revision of the English by a native speaker, and the authors should upload high-resolution figures with labels that are readable.

**Response:** To underscore our determination to enhance the quality of the manuscript, we have undertaken a complete revamp of all the visuals in the article. Furthermore, we have made language revisions throughout the manuscript to ensure it is better suited for native English speakers to read and comprehend.

### **Specific comments**

Section 1: I think the introduction lacks some paragraphs describing the usefulness of stable isotopes of hydrogen and oxygen to investigate water fluxes in the soil-plant-atmosphere continuum. Furthermore, the novelty of this work is not clear (it seems a case study, but there are many like this one), and the specific objectives and/or the research questions should be clearly addressed.

**Response:** Thank you for your feedback. We have inserted the following sentence into the introduction:

The interaction between soil and vegetation controls rainfall input and water

transfer within ecosystem components. It is an important player in climate change mitigation in terms of climate benefits (Rohatyn et al., 2022). In the face of complex climate changes, unpredictable weather variations, and continual alterations in surface coverage, the subsystems comprising the atmospheric, soil, and vegetation components in ecohydrological systems undergo corresponding changes in resilience, fragility, and sensitivity. Water moves from the soil through plant roots and stems, eventually reaching the leaves. During photosynthesis, water vapor is released into the atmosphere through open stomata. Stable isotopes of hydrogen and oxygen serve as natural tracers, enabling monitoring of the vertical migration and transformation of water in the ecosystem (Goodwell et al., 2018).

The semi-arid natural environment influences the hydrological processes in the soil-plant-atmosphere continuum. However, the contribution of vegetation transpiration (T) to water fluxes in these mountainous regions, which rely on rainfall and snowmelt as water sources, remains unclear. Furthermore, most studies have focused solely on partitioning evapotranspiration within the ecosystem, which obscures the fate of water vapor. In our research, we analyze the water vapor fluxes from soil evaporation and vegetation transpiration into the atmosphere, which is crucial for understanding water loss dynamics and ensuring appropriate allocation of water resources in the upstream and downstream regions of mountainous areas.

Section 2: The authors should add the area of the catchment and of the study site (it is unclear whether it is a subcatchment, a hillslope or a plot), and more specific topographic characteristics (e.g., elevation range, slope, aspect etc.). Lithology, soil type and texture should be described as well.

**Response:** We have made revisions to Section 2 based on your feedback, **as follows:**

## **2. Study area**

The Qilian Mountains are located in the central part of the Eurasian continent, on the northeastern edge of the Qinghai-Tibet Plateau. The eastern region is dominated by water erosion, with large variations in mountainous terrain and an average elevation of over 4,000 meters. Permafrost is developed at elevations of 3,500 to 3,700 meters, and areas above 4,500 meters are characterized by modern glacier development. The region has a plateau continental climate, with hot summers and cold winters, strong solar radiation, and large temperature differences between day and night. The average annual temperature is below 4°C, with extreme highs of 37.6°C and extreme lows of -35.8°C. The annual sunshine hours range from 2,500 to 3,300 hours, with a total solar radiation of 5,916 to 15,000 megajoules per square meter. The average annual precipitation is 400 millimeters, and the annual evaporation ranges from 1,137 to 2,581 millimeters. The average wind speed is around 2 meters per second, and the frost-free period lasts from 23.6 to 193 days. The Shiyang River originates from the Daxueshan on the northern side of the Lenglong Ridge in the eastern section of the Qilian Mountains, serving as a major water source for the city of Wuwei. The soil types in the eastern section are diverse, but with low organic matter content. The distribution of vegetation shows distinct zonal characteristics, with mountainous forest-grassland zones (2,600 to 3,400 meters), subalpine shrub-meadow zones (3,200 to 3,500 meters), and high mountain sub-ice-snow sparse vegetation zones (>3,500 meters) at elevations above 2,700 meters. The main types of natural forest vegetation include Qinghai spruce forest, Qilian juniper forest, and Chinese pine forest, with Qinghai spruce being the dominant tree species (Zhu et al., 2022).

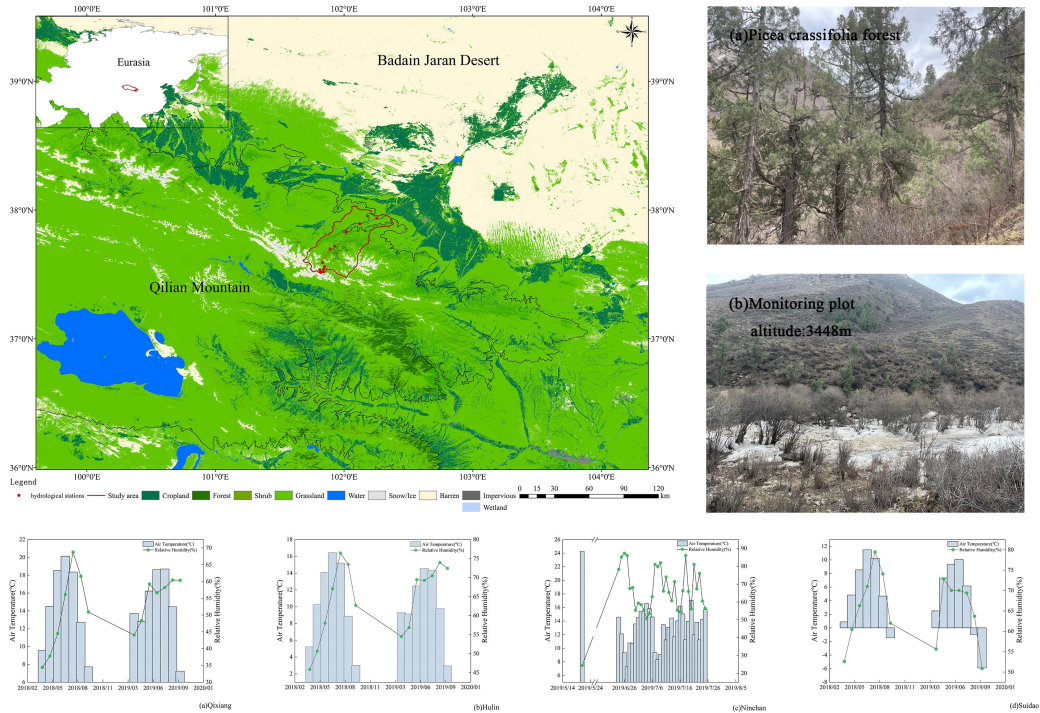

Figure 1 Location of the study area and changes in meteorological conditions

Section 3.1: In this section, the authors should provide clear and detailed information about meteorological data and water sample collection. About meteorological data, the authors should clarify whether the station is located in the study site (is it representative of the local meteorological conditions?) and the temporal resolution of the measurements. About water samples, details should include temporal (monthly, weekly, daily or event timescale?) and spatial resolution (how many locations for each water source? At which elevation?), as well as depth for soil water samples (and how many locations?) and xylem samples (how many trees and locations were considered?). Furthermore, in this section the authors should describe the methodological approaches used for precipitation collection (what kind of collector was used?) and extraction of water samples from soil and plants (what kind of plant tissue was collected?)

**Response:** Thank you very much for your meticulous feedback on this section. We have taken your comments seriously and made the following revisions:

## 1.1 Materials Sources

### 1.1.1 Sampling network

Table 1 Sampling Point Locations and Sample Quantity Information

| Parameter | Station | Qixiang | Hulin | Ninchan | Suidao |
|-----------|---------|---------|-------|---------|--------|
|-----------|---------|---------|-------|---------|--------|

|                     |                         |      |        |      |      |
|---------------------|-------------------------|------|--------|------|------|
|                     | Altitude(m)             | 2543 | 2721   | 3068 | 3448 |
| Local<br>climate    | Temperature(°C/a)       | 3    | 3.2    | 3.3  | -0.9 |
|                     | Precipitation(mm/a)     | 510  | 469.44 | 394  | 475  |
|                     | Relative humidity (%/a) | 52.9 | 56.1   | 66.6 | 69.2 |
| Samplings<br>number | Precipitation           | 53   | 108    | 91   | 135  |
|                     | Soil water              | 220  | 560    | 560  | 560  |
|                     | Xylem water             | 236  | 56     | 56   | 56   |

### 3.1.2 Sample collection

We use an automatic weather station in 2018 and 2019 to record meteorological data, in which a rain gauge is used to collect precipitation and transfer samples to 100ml containers after each rain. Drill holes 0 ~ 5 cm, 5 ~ 10 cm, 10 ~ 20 cm, 20 ~ 30 cm, 30 ~ 40 cm, 30 ~ 50 cm, 50 ~ 60 cm, 60 ~ 70 cm, 70 ~ 80 cm, 80 ~ 90 cm, 90 in the sample plot by using soil drill ~ 100 cm. The soil samples were divided into two parts, one of which was placed in a 50 ml glass bottle. The bottle was sealed with a subfilm and transported to the observation station within 10 hours after the sampling date was marked for cryopreservation to detect stable isotope data. The other part of the sample was placed in a 50ml aluminum box and the soil moisture content was determined by drying method. When collecting plant samples, we used scissors to collect vegetation xylem stems, peeled off the bark, and put them in 50ml glass bottles sealed and frozen for experimental analysis.

We utilized the monthly potential evapotranspiration dataset of China, with a spatial resolution of 0.0083333° (approximately 1 km), covering the period from January 1990 to December 2021. The data is measured in units of 0.1 mm. This dataset is derived from the China 1 km monthly mean temperature, minimum temperature, and maximum temperature dataset (Peng et al., 2022; Ding et al., 2020; Ding et al., 2021), using the Hargreaves equation for estimating potential evapotranspiration (Peng et al., 2017). The formula is as follows:  $P_{ET} = 0.0023 \times S_0 \times (MaxT - MinT)0.5 \times (MeanT + 17.8)$ , where  $P_{ET}$  represents potential evapotranspiration in mm/month,  $MaxT$ ,  $MinT$ , and  $MeanT$  are the monthly maximum temperature,

minimum temperature, and mean temperature, respectively.  $S_0$  represents the theoretical solar radiation reaching the top of the Earth's atmosphere, calculated based on solar constant, distance between Earth and the sun, Julian day, and latitude. For data storage convenience, the values are stored as int16 type in NETCDF (nc) files. The surface evapotranspiration data were obtained from the MODIS-based daily surface evapotranspiration data of the Qilian Mountains (2019), with a spatial resolution of  $0.01^\circ$  (Yao et al., 2017; Yao et al., 2020) .

Section 3: This section also lacks a paragraph reporting how water samples were transported and stored before isotopic analyses, and details about laboratory analyses. These details should include the methodology used for isotopic analyses of the different water samples, the uncertainty in the isotopic measurements, any information about protocols used to ensure the quality of the analyses.

**Response:** Thank you for your suggestions. We have rewritten this section based on your feedback. Here is the revised version:

### **3.2 Experimental Analysis**

The isotopic data used in this study mainly include stable isotopes of precipitation, soil water, and xylem water. All isotopic samples were analyzed at the Stable Isotope Laboratory of Northwest Normal University. The precipitation samples were analyzed for hydrogen and oxygen stable isotopes using a liquid water isotope analyzer (DLT-100, Los Gatos Research, USA). After thawing the soil and vegetation samples, they were extracted using a low-temperature vacuum condensation device (LI-2100, LICA United Technology Limited, China), and the extracted water was subjected to isotopic analysis. Each water sample was tested six times to ensure accuracy, with the first two tests considered as interference and only the results of the subsequent four tests were averaged (Zhu et al., 2022). The isotopic measurements are represented by  $\delta$ , which represents the deviation in parts per thousand of the ratio of two stable isotopes in the sample relative to the ratio in a standard sample. The International Atomic Energy Agency (IAEA) defined the Vienna Standard Mean

Ocean Water (VSMOW) in 1968 as the standard for isotopic composition, which is derived from distilled seawater and has a similar isotopic composition to Standard Mean Ocean Water (SMOW).

$$\delta = \left( \frac{\delta_{\text{Sampling}}}{\delta_{\text{Standard}}} - 1 \right) \times 1000\% \quad (1)$$

In Section 3.3.5 and 3.3.6, the authors should clarify if they have assessed the uncertainty in their estimations, for instance, by error propagation and based on the uncertainty in the isotopic analyses and isotopic variability among various samples.

**Response:** This is a great question, and we have made modifications to the content based on your feedback. We have addressed the uncertainties related to sections 3.3.5 and 3.3.6 separately in section 5.2 Uncertainty Analysis. Additionally, we have presented how we avoided isotopic variations among samples in section 3.2 Experimental Analysis.

Table 1: The number of xylem water samples (only 7) used for this study is too low. I think these few samples alone cannot support findings and the conclusions

**Response:**Your concern is entirely justified, and in the revised manuscript, we have addressed it by adding more sampling points and extending the sampling duration, thus avoiding any potential unreliability in the analysis results. **The additional information on the sampling points is provided below:**

Table 1 Sampling Point Locations and Sample Quantity Information

| Parameter     | Station                 | Qixiang | Hulin  | Ninchan | Suidao |
|---------------|-------------------------|---------|--------|---------|--------|
| Local climate | Altitude(m)             | 2543    | 2721   | 3068    | 3448   |
|               | Temperature(°C/a)       | 3       | 3.2    | 3.3     | -0.9   |
|               | Precipitation(mm/a)     | 510     | 469.44 | 394     | 475    |
|               | Relative humidity (%/a) | 52.9    | 56.1   | 66.6    | 69.2   |



|                     |               |     |     |     |     |
|---------------------|---------------|-----|-----|-----|-----|
| Samplings<br>number | Precipitation | 53  | 108 | 91  | 135 |
|                     | Soil water    | 220 | 560 | 560 | 560 |
|                     | Xylem water   | 236 | 56  | 56  | 56  |

We have revised the original Table 1 in Section 4.1 and renamed it as Table 2. Furthermore, we have made adjustments to the content of the table. **As follows:**

During the growth season of Qinghai spruce, the stable isotopes of precipitation exhibit specific patterns of fluctuation (Table 2). In the early stages of growth, the hydrogen and oxygen isotope values are generally low. As the temperature gradually increases, the extent of water evaporation and loss intensifies, leading to an enrichment of stable isotopes. The average  $\delta^2\text{H}$  value of precipitation throughout the growth season is  $-45.52\text{‰}$ , fluctuating roughly between  $-238.62\text{‰}$  and  $63.43\text{‰}$ . The average  $\delta^{18}\text{O}$  value is  $-7.75\text{‰}$ , fluctuating roughly between  $-31.49\text{‰}$  and  $14.79\text{‰}$ . There is not a significant depletion or enrichment of stable isotopes in the wood tissues, with a fluctuation range of  $-76.95\text{‰}$  to  $23.87\text{‰}$  for  $\delta^2\text{H}$  and  $-11.92\text{‰}$  to  $24.77\text{‰}$  for  $\delta^{18}\text{O}$ . Shallow soil water shows a less pronounced enrichment of heavy isotopes compared to precipitation and wood tissues, with a lower degree of fluctuation observed during late spring and the beginning of summer.

Table 2 Stable isotopes of different water bodies during the growing season

| Average<br>Period | $\delta^2\text{H}/\text{‰}$ |             |                        | $\delta^{18}\text{O}/\text{‰}$ |             |                        |
|-------------------|-----------------------------|-------------|------------------------|--------------------------------|-------------|------------------------|
|                   | Precipitation               | Xylem water | Soil water<br>(0~10cm) | Precipitation                  | Xylem water | Soil water<br>(0~10cm) |
| 4                 | -69.15                      | -39.02      | -53.10                 | -10.25                         | 2.56        | -7.10                  |
| 5                 | -39.09                      | -29.78      | -45.38                 | -7.61                          | 4.44        | -6.42                  |
| 6                 | -31.29                      | -45.83      | -46.08                 | -5.74                          | -2.83       | -6.12                  |
| 7                 | -32.39                      | -47.63      | -47.71                 | -5.33                          | -0.97       | -7.06                  |
| 8                 | -48.88                      | -44.55      | -68.85                 | -7.79                          | -2.06       | -9.07                  |
| 9                 | -29.38                      | -42.62      | -49.20                 | -6.46                          | -1.83       | -6.79                  |

---

Figure 3a: The authors report soil depths here, but they should have described those sampling depths in a previous section. Furthermore, the authors should clearly explain why soil depth varies for various sampling times.

**Response:** Thank you for your feedback. What I intended to convey here is to utilize soil moisture content at different depths to reflect the information of unbalanced fractionation in soil evaporation. However, it seems that our original figures and sampling points deviated from this intention. **Therefore, we have reorganized this section accordingly, as follows:**

Unsaturated water vapor leads to non-equilibrium fractionation during the process of precipitation, with an average d-excess value of 16.58‰ throughout the growing season (Figure 3, a). In May and September, due to higher relative humidity compared to other periods, the evaporation rate of water vapor is faster. The deuterium values show slow fluctuations from June to August, with significant fluctuations starting from mid-August, indicating that local evaporation is gradually enhanced over time due to the influence of temperature and relative humidity, leading to increased non-equilibrium evaporation. The average lc-excess value of precipitation in the lower layer of forest distribution is -8.18‰, while the average lc-excess value of precipitation in the middle, upper-middle, and canopy layers is close to 0. This is because the fractionation effect of evaporation is more pronounced at lower elevations. At higher elevations, influenced by rainfall and snowmelt, the soil moisture content in all soil layers is above 30% (Figure 3, b). Towards the end of the growing season, as temperatures decrease, tree leaves fall to the forest floor, forming a litter layer that retains moisture in the soil.

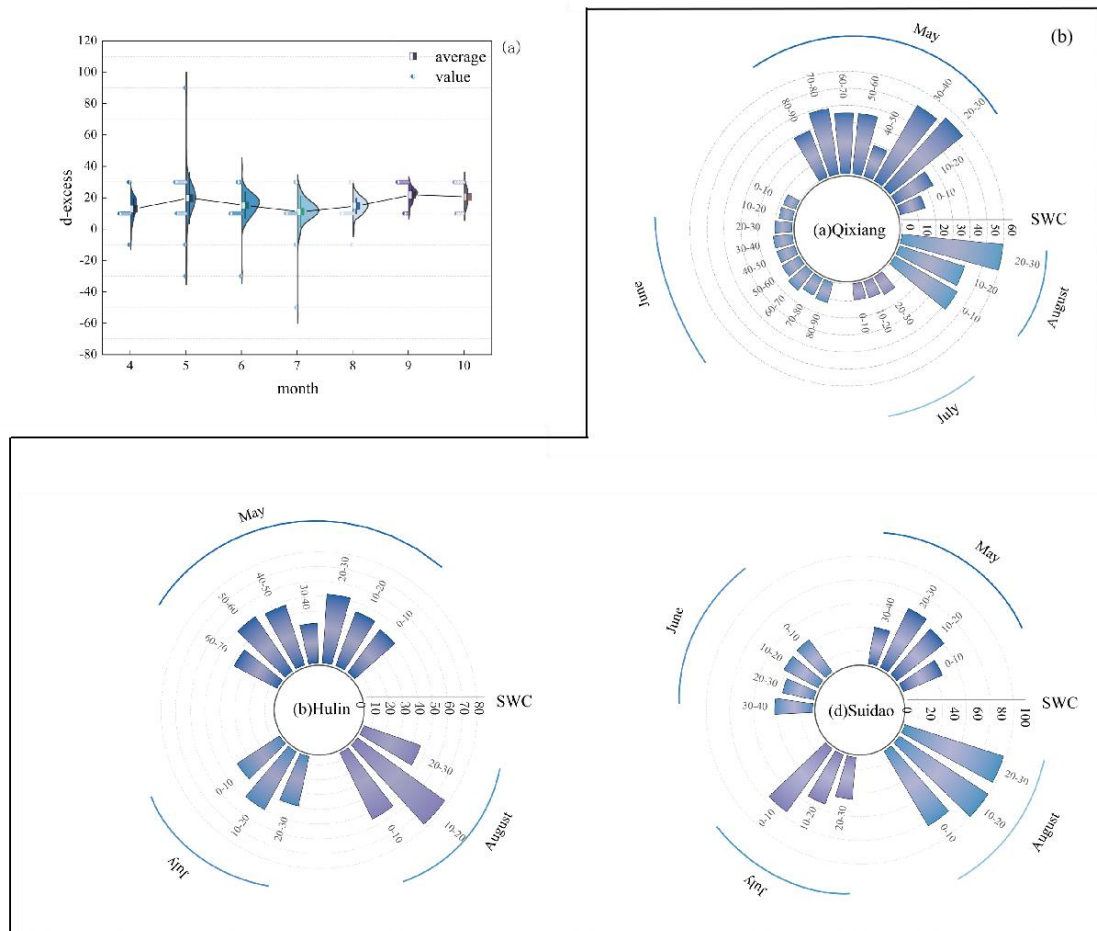

Figure 3 (a) Variation in soil water content, (b) Comparison between atmospheric water vapour oxygen isotopes and d-excess

Figure 7: The authors should indicate the uncertainty in their estimates, clearly in the text and by error bars in this figure.

**Response:** Thank you for your feedback. We have restructured section 5.1.2 "Contribution to recirculating water vapor in precipitation" and conducted an analysis of the associated uncertainties. We have also redesigned the tables and figures accordingly. In Figure 7, we have compared the contribution rates of each component only for the growing season. As there are only values available for 7 months for each component, I have not included error bars for visual clarity. I hope you understand

this approach. **As follows:**

### 5.1.2 Contribution to recirculating water vapour in precipitation

Our previous study in the eastern section of the Qilian Mountains (Zhang et al., 2021) indicated that above an altitude of 2100m, air masses gather from the northern foothills and move along the valley from low to high elevations. From June to August, the atmospheric circulation is influenced by westerlies, southeast monsoons, and plateau monsoons, while from September to October, the westerlies are the dominant factor. Therefore, we selected the Xiying station at an altitude of 2097m as our upwind site. The  $\delta_{pv}$  values showed depletion in April and October, gradually enriching from June to August. The maximum  $\delta^2\text{H}$  value was -76.02‰ (Table 5), and the minimum was -184.93‰, while the maximum  $\delta^{18}\text{O}$  value was -11.89‰, and the minimum was -26.38‰. Above 2700 meters, there is a gradual decrease in precipitation vapor with increasing altitude. The  $\delta_{ev}$  values exhibited significant fluctuations throughout each month, with different patterns at different locations. At 2721m, the  $\delta_{ev}$  range varied between -172.3‰ and 96.39‰. From the forest's lower layer to the upper layer, the isotopic composition of the advected moisture from the valley gradually diminished, resulting in decreasing values of  $\delta_{adv}$ .

Table 5 Isotopic Composition of Precipitation Vapor, Surface Evaporation Vapor, and Vegetation Transpiration Vapor at Different Months and Altitudes

| Month          | Type                           | isotope                        | April   | May     | June    | July    | August  | September | October |
|----------------|--------------------------------|--------------------------------|---------|---------|---------|---------|---------|-----------|---------|
| Qixiang        | $\delta_{pv}$                  | $\delta^2\text{H}/\text{‰}$    | -141.95 | -123.83 | -99.87  | -115.99 | -128.34 | -120.9    | -152.43 |
|                |                                | $\delta^{18}\text{O}/\text{‰}$ | -19.27  | -16.58  | -14.04  | -15.91  | -18.6   | -17.22    | -22.34  |
|                | $\delta_{ev}$                  | $\delta^2\text{H}/\text{‰}$    | -       | -125.69 | -123.69 | -117.98 | -134.57 | -         | -       |
|                |                                | $\delta^{18}\text{O}/\text{‰}$ | -       | -30.21  | -29.56  | -28.62  | -31.19  | -         | -       |
|                | $\delta_{tr}$                  | $\delta^2\text{H}/\text{‰}$    | -39.9   | -29.32  | -46.19  | -49.58  | -45.15  | -42.66    | -44.64  |
|                |                                | $\delta^{18}\text{O}/\text{‰}$ | 2.22    | -5.87   | -4.59   | -0.72   | -1.72   | -1.78     | -2.26   |
| $\delta_{adv}$ | $\delta^2\text{H}/\text{‰}$    | -145.57                        | -83.25  | -81.12  | -92     | -109.62 | -100.53 | -122.62   |         |
|                | $\delta^{18}\text{O}/\text{‰}$ | -20.24                         | -11.93  | -10.73  | -12.06  | -15.31  | -13.46  | -18.16    |         |
| Hulin          | $\delta_{pv}$                  | $\delta^2\text{H}/\text{‰}$    | -129.93 | -123.29 | -98.68  | -113.98 | -124.16 | -118.52   | -164.82 |
|                |                                | $\delta^{18}\text{O}/\text{‰}$ | -17.54  | -16.62  | -13.18  | -15.48  | -17.33  | -17.88    | -22.46  |
|                | $\delta_{ev}$                  | $\delta^2\text{H}/\text{‰}$    | -114.24 | -117.01 | -107.75 | -123.44 | -106.92 | -96.39    | -172.3  |

|         |                       |                                |         |         |         |         |         |         |         |
|---------|-----------------------|--------------------------------|---------|---------|---------|---------|---------|---------|---------|
|         |                       | $\delta^{18}\text{O}/\text{‰}$ | -14.77  | -16.35  | -15.03  | -16.7   | -14.53  | -12.78  | -24.82  |
|         | $\delta_{\text{tr}}$  | $\delta^2\text{H}/\text{‰}$    | -24.12  | -39.62  | -35.97  | -26.44  | -35.85  | -38.39  | -40.53  |
|         |                       | $\delta^{18}\text{O}/\text{‰}$ | -5.34   | -3.58   | -4.13   | -0.34   | -2.35   | -4.25   | -1.97   |
|         | $\delta_{\text{adv}}$ | $\delta^2\text{H}/\text{‰}$    | -112.79 | -115.67 | -106.61 | -122.19 | -106.49 | -95.7   | -170.54 |
|         |                       | $\delta^{18}\text{O}/\text{‰}$ | -14.59  | -16.15  | -14.88  | -16.54  | -14.46  | -12.69  | -24.57  |
| Ninchan | $\delta_{\text{pv}}$  | $\delta^2\text{H}/\text{‰}$    | -       | -76.02  | -139.21 | -135.74 | -129.96 | -113.71 | -184.93 |
|         |                       | $\delta^{18}\text{O}/\text{‰}$ | -       | -11.89  | -19.87  | -18.7   | -17.91  | -16.77  | -26.38  |
|         | $\delta_{\text{ev}}$  | $\delta^2\text{H}/\text{‰}$    | -       | -83.76  | -81.42  | -92.42  | -110.24 | -101.11 | -123.42 |
|         |                       | $\delta^{18}\text{O}/\text{‰}$ | -       | -12.01  | -10.76  | -12.09  | -15.37  | -13.49  | -18.27  |
|         | $\delta_{\text{tr}}$  | $\delta^2\text{H}/\text{‰}$    | -       | -25.58  | -46.77  | -37.77  | -43.66  | -       | -       |
|         |                       | $\delta^{18}\text{O}/\text{‰}$ | -       | -3.45   | -1.98   | -1.05   | -6.68   | -       | -       |
|         | $\delta_{\text{adv}}$ | $\delta^2\text{H}/\text{‰}$    | -162.36 | -113.49 | -111.45 | -106.16 | -122.12 | -114.67 | -141.33 |
|         |                       | $\delta^{18}\text{O}/\text{‰}$ | -22.73  | -15.94  | -15.28  | -14.46  | -16.96  | -16.58  | -20.42  |
|         | $\delta_{\text{pv}}$  | $\delta^2\text{H}/\text{‰}$    | -167.86 | -128.08 | -124.95 | -117.32 | -137.73 | -130.44 | -155.52 |
|         |                       | $\delta^{18}\text{O}/\text{‰}$ | -22.9   | -18.02  | -17.28  | -16.04  | -19.09  | -18.64  | -21.59  |
| Suidao  | $\delta_{\text{ev}}$  | $\delta^2\text{H}/\text{‰}$    | -164.16 | -114.52 | -112.37 | -106.9  | -122.96 | -115.47 | -142.85 |
|         |                       | $\delta^{18}\text{O}/\text{‰}$ | -22.98  | -16.07  | -15.41  | -14.56  | -17.08  | -16.69  | -20.64  |
|         | $\delta_{\text{tr}}$  | $\delta^2\text{H}/\text{‰}$    | -       | -25.58  | -46.77  | -37.77  | -43.66  | -       | -       |
|         |                       | $\delta^{18}\text{O}/\text{‰}$ | -       | -8.45   | -6.98   | -6.05   | -6.68   | -       | -       |
|         | $\delta_{\text{adv}}$ | $\delta^2\text{H}/\text{‰}$    | -162.38 | -113.51 | -111.47 | -106.18 | -122.14 | -114.69 | -141.36 |
|         |                       | $\delta^{18}\text{O}/\text{‰}$ | -22.73  | -15.94  | -15.28  | -14.47  | -16.97  | -16.58  | -20.42  |

In July, the ratio of vegetation transpiration to precipitation vapor is significantly higher compared to other months. The temperatures in the lower layers of the forest are relatively high, and the middle to upper layers are densely populated with spruce, resulting in a higher  $f_{\text{tr}}$  (transpiration ratio) throughout the entire growing season. Both the early and late stages of the growing season exhibit noticeably higher  $f_{\text{ev}}$  (evaporation ratio) compared to other months, with the middle and upper parts of the forest having a higher proportion of evaporated vapor. The average  $f_{\text{adv}}$  (advected vapor ratio) is 72%, with contributions exceeding 70% for all months except June and July (Figure 7).

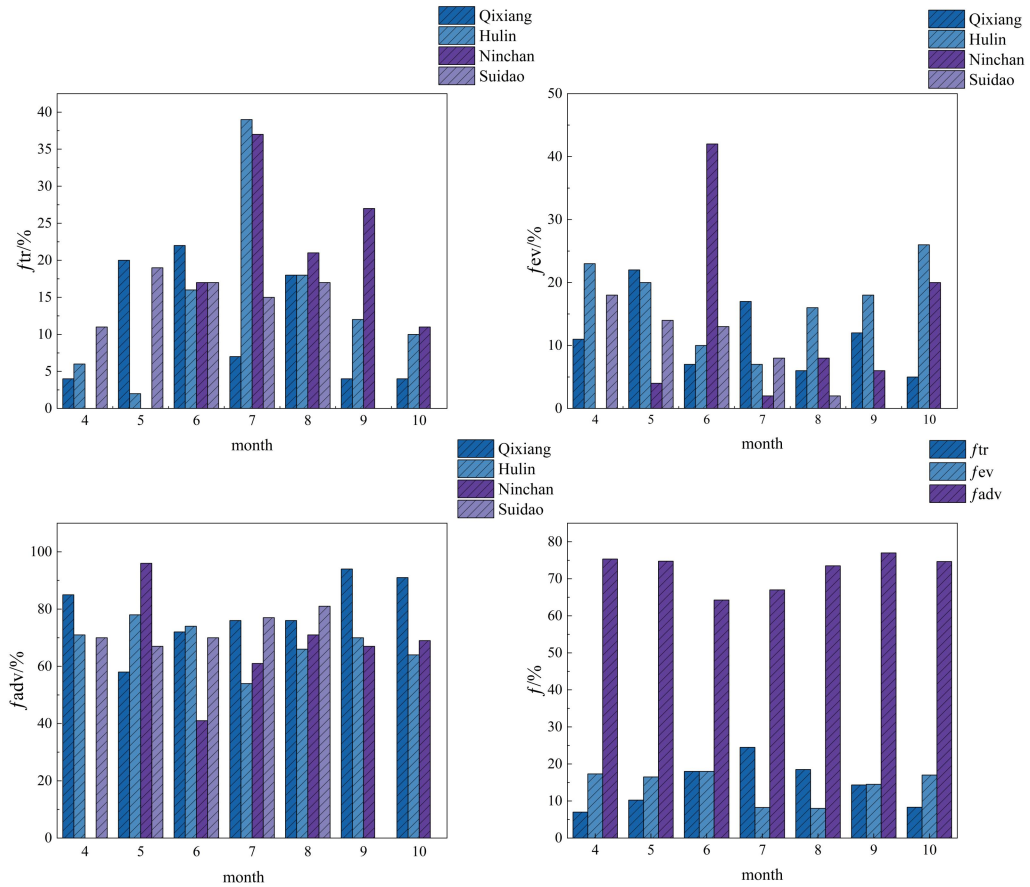

Figure 7 Comparison of  $f_{adv}$  (advective water vapour contribution),  $f_{ev}$  (surface evaporation water vapour contribution) and  $f_{tr}$  (plant transpiration water vapour contribution) for each of period

I do not understand the purpose of Section 5.2 and the title does not reflect the content of the section.

**Response:** I completely agree with your viewpoint, and therefore, I have removed that section from the manuscript. Instead, I have revised section 5.2 to focus on uncertainty analysis. **As follows:**

## 5.2 Uncertainty analysis

A higher sample size can reduce the margin of error. Therefore, we utilized isotopic data from four sites over a two-year period to evaluate the model. We used 404 xylem samples to calculate the contribution ratio of transpiration to ecosystem evapotranspiration. We examined the uncertainty of the model evaluation. When analyzing the evaporation characteristics in a semi-arid natural environment using the Craig-Gordon isotopic model, we first eliminated the influence of solar radiation and other meteorological variables on the calculation results. We focused on temperature, relative humidity, water vapor, and the initial isotopic values of water bodies. Particularly in semi-arid environments, the variations in temperature and relative humidity are crucial (Hernández-Pérez et al., 2020). To verify the calculation results, we found a strong correlation between the isotopes of soil evaporation and relative humidity, as demonstrated by the fitting of  $\delta_E$  against relative humidity and temperature. This also indicates the reliability of the results obtained through the Craig-Gordon isotopic model. We employed the Keeling plot method to calculate  $\delta_{ET}$ , which is based on isotopic mass balance and a two-endmember mixing model. This method assumes that the isotopic composition of the background atmosphere and source remains constant, with a very low probability of isotopic spatial variation (Good et al., 2012; Kool et al., 2014). Due to the higher reliability of oxygen isotopes compared to hydrogen isotopes (Han et al., 2022; Kale et al., 2022), we solely used oxygen isotopes to calculate the T/ET values. The results indicate that transpiration significantly outweighs evaporation during July and August, which aligns with previous research findings (Zhu et al., 2022). The correlation between T/ET and soil moisture content suggests that soil moisture is a crucial factor driving the variations in transpiration and evaporation ratios. Additionally, the estimation of isotopic composition of advected water vapor from the upwind sites contributes to increased uncertainty. In our study area, the sites are predominantly influenced by valley winds, with water vapor moving from the valley bottom to higher altitudes.

Therefore, we selected lower elevation areas in the valley bottom as the source region for advected water vapor (Zhang et al., 2021).

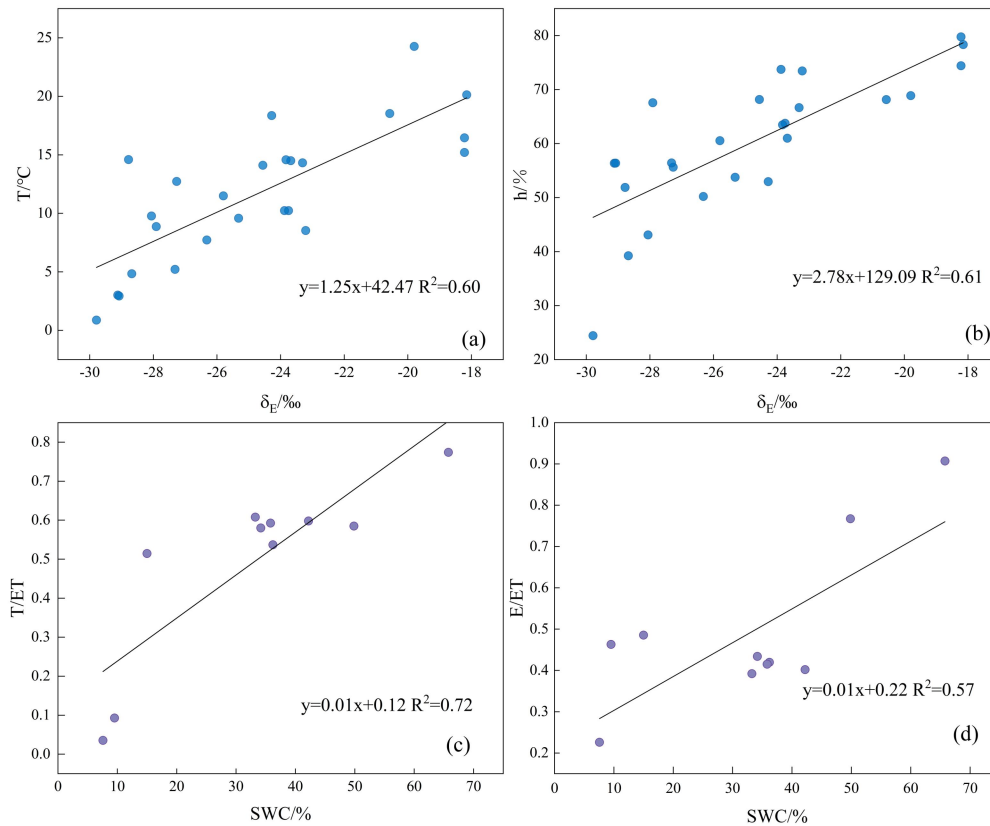

Figure 8 Correlation analysis of factors affecting uncertainty in impact assessment

### Technical corrections

- Figure 1: Labels are difficult to read. I suggest increasing their size and resolution.
- Line 107: “Water isotopes...were observed” is an unusual phrasing; please change the verb.
- Figure 2: Again, labels are difficult to read. I suggest increasing their size and resolution.
- Figure 3, 4, 5 and 7: Please increase the size of the labels.
- Figure 8a: The legend is unreadable; please increase the size and the resolution of the labels.



**Response:** We have carefully addressed your feedback regarding the figures. In order to enhance the overall quality of the paper, we have recreated all the figures in our manuscript, removing any inappropriate sentences.

We would like to invite you to review the significant changes we have made in the revised manuscript. Attached below is the PDF of the manuscript:

1 Hydrological effects of evapotranspiration in the Qilian Mountains  
2 forest belt

3 Yinying Jiao<sup>1,2</sup>, Guofeng Zhu<sup>1,2\*</sup>, Dongdong Qiu<sup>1,2</sup>, Yuwei Liu<sup>1,2</sup>, Lei Wang<sup>1,2</sup>, Siyu  
4 Lu<sup>1,2</sup>, Gaojia Meng<sup>1,2</sup>, Xinrui Lin<sup>1,2</sup>, Rui Li<sup>1,2</sup>, Qinqin Wang<sup>1,2</sup>, Longhu Chen<sup>1,2</sup>, Niu  
5 Sun<sup>1,2</sup>

6 <sup>1</sup> School of Geography and Environment Science, Northwest Normal University,  
7 Lanzhou 730070, Gansu, China

8 <sup>2</sup> Shiyang River Ecological Environment Observation Station, Northwest Normal  
9 University, Lanzhou 730070, Gansu, China

10 **Abstract:** Mountainous regions play a crucial role as primary water sources and  
11 origins of rivers. The changing climate patterns worldwide are altering the distribution  
12 of vegetation and water utilization methods. Hence, gaining a comprehensive  
13 understanding of evapotranspiration in mountainous forest zones is essential for  
14 comprehending the ecohydrological impact of vegetation and its influence on the  
15 water cycle within the watershed. We collected precipitation, soil water from 0 to  
16 100cm, xylem water from Qinghai Spruce, temperature, relative humidity and rainfall  
17 in the eastern Qilian Mountains from 2018 to 2019. We simulated T/ET  
18 comprehensively, and quantified the contribution of recirculated water vapor in  
19 precipitation. The aim of this study was to clarify the evapotranspiration process and  
20 its effect on production and confluence in the forest belt of Qilian Mountain. The  
21 study revealed that transpiration from Qinghai spruce trees constituted the largest  
22 portion of evapotranspiration within the entire Qinghai spruce forest ecosystem,  
23 averaging 57%. This indicates that transpiration surpasses evaporation during the  
24 growing season. Soil water content and air humidity emerged as the primary factors  
25 influencing evapotranspiration within the Qinghai spruce forest zones. Throughout  
26 each month of the growing season, evapotranspiration from Qinghai spruce was found  
27 to exceed precipitation. Water loss through evapotranspiration is much greater than

28 water inputs from precipitation and surface water replenishment. Consequently, the  
29 forest zone does not yield flows in the eastern part of the Qilian Mountains. The  
30 warming of global temperatures and human activities are likely to trigger shifts in the  
31 distribution areas and evapotranspiration regimes of Qinghai spruce, which in turn  
32 will lead to a change in water resource patterns in the basin.

33 **Keywords:** Qinghai spruce; stable isotopes; end-member mixing model;  
34 evapotranspiration partitioning

## 35 1. Introduction

36 Future droughts are likely to be more frequent, more severe, and longer-lasting  
37 than in recent decades. Under the influence of climate change, in ecologically fragile  
38 areas, particularly in arid and semi-arid regions, these changes will be the most rapid  
39 and extreme (Ault et al., 2020). As a natural reservoir and purifier, the Qinghai spruce  
40 ecosystem has the functions of storing, releasing and purifying water. The Qilian  
41 Mountains supply the water resources that human beings depend on for survival in the  
42 continental river basin in the arid region, regulate the water cycle in the arid region,  
43 and interact with the soil and atmosphere to form a vertical spatial continuum, which  
44 not only affects the ecological process of the local plant community, but also changes  
45 the regional microclimate by means of latent heat (Zhang et al., 2021). As a water  
46 source for several inland rivers, the Qilian Mountains are an important ecological  
47 security barrier and a priority area for biodiversity conservation in central Asia. The  
48 spruce forest ecosystem provides various ecological, climatic, and social benefits to  
49 the Qilian Mountains but is highly vulnerable to drought and temperature extremes.  
50 More to the point, climate drivers put spruce forests at risk from drought and heat  
51 stress. As the magnitude of climate change increases, the disturbance to its ecosystem  
52 is also expected to be higher. The interaction between soil and vegetation controls  
53 rainfall input and water transfer within ecosystem components. It is an important  
54 player in climate change mitigation in terms of climate benefits (Rohatyn et al., 2022).  
55 In the face of complex climate changes, unpredictable weather variations, and  
56 continual alterations in surface coverage, the subsystems comprising the atmospheric,

57 soil, and vegetation components in ecohydrological systems undergo corresponding  
58 changes in resilience, fragility, and sensitivity. Water moves from the soil through  
59 plant roots and stems, eventually reaching the leaves. During photosynthesis, water  
60 vapor is released into the atmosphere through open stomata. Stable isotopes of  
61 hydrogen and oxygen serve as natural tracers, enabling monitoring of the vertical  
62 migration and transformation of water in the ecosystem(Goodwell et al., 2018).

63 Evapotranspiration (ET) is an indispensable part of the terrestrial water and  
64 energy cycle. Therefore, exploring the spatio-temporal and component changes of soil  
65 evaporation and vegetation transpiration can help us increase the response of  
66 vegetation canopy to climatechange (Liu et al., 2022). At the ecosystem scale, many  
67 studies have classified evapotranspiration (ET) as transpiration (T) and  
68 evapotranspiration (E) (Schlesinger et al.,2014). The measurement of  
69 evapotranspiration (ET) in field research is often based on physical evaporation from  
70 the soil surface and biological transpiration, which involves the uptake of soil water  
71 by roots and the loss of water vapor through plant stomata during photosynthesis.  
72 Some studies have classified evaporation (E) and transpiration (T) by analyzing the  
73 isotopic composition of oxygen in soil and runoff, finding that  $\delta^{18}\text{O}$  enrichment is  
74 primarily associated with evaporation rather than transpiration (Wershaw et al., 1966).  
75 Differentiating between soil evaporation and stomatal plant evapotranspiration is a  
76 challenging yet crucial task for assessing biomass production and allocating scarce  
77 water resources effectively. Generally, plant evapotranspiration (T) is the desired  
78 component of water that enhances plant productivity, while soil evaporation (E) is  
79 considered a source of water loss or inefficiency. The magnitude of soil evaporation  
80 can be significant in sparsely vegetated systems, especially in arid regions or very wet  
81 systems such as surface irrigated crops and wetlands (Liu et al., 2015; Zhang et al.,  
82 2018). Zoning evapotranspiration is essential for accurately monitoring system  
83 hydrology and implementing improved water management practices in these specific  
84 scenarios (Kool et al., 2014). Quantifying the role of regional evapotranspiration in  
85 the terrestrial water balance and the global water cycle is therefore critical.

86 On regional and global scales, there are various methods employed to partition

87 evapotranspiration. Firstly, in river basins, researchers investigate the role of lateral  
88 groundwater flow in distributing evapotranspiration by utilizing comprehensive  
89 continental-scale hydrological models. These models couple vegetation and land  
90 energy processes with surface and underground hydrology to study the distribution of  
91 evapotranspiration at the continental scale (Maxwell et al., 2016). Secondly, remote  
92 sensing-based approaches are employed to identify differences in evapotranspiration  
93 partitioning among different models (Talsma et al., 2018; Chen et al., 2022). Thirdly,  
94 eddy covariance methods are utilized to assess multi-year energy fluxes and  
95 evapotranspiration in typical alpine meadows, exploring the environmental and  
96 biophysical controls on evapotranspiration (Chang et al., 2022). Additionally, studies  
97 synthesize available literature data to establish quantitative relationships between  
98 evapotranspiration allocation and vegetation cover indices (such as leaf area index, or  
99 LAI) in agricultural and natural systems. These studies aim to explain observed  
100 changes in T/ET at global scales (Wang et al., 2014; Wei et al., 2018; Cui et al., 2021).

101 The semi-arid natural environment influences the hydrological processes in the  
102 soil-plant-atmosphere continuum. However, the contribution of vegetation  
103 transpiration (T) to water fluxes in these mountainous regions, which rely on rainfall  
104 and snowmelt as water sources, remains unclear. Furthermore, most studies have  
105 focused solely on partitioning evapotranspiration within the ecosystem, which  
106 obscures the fate of water vapor. In our research, we analyze the water vapor fluxes  
107 from soil evaporation and vegetation transpiration into the atmosphere, which is  
108 crucial for understanding water loss dynamics and ensuring appropriate allocation of  
109 water resources in the upstream and downstream regions of mountainous areas.

110 As a vascular plant species, Qinghai spruce forests are one of the important  
111 entry points for energy and materials in the environment into terrestrial ecosystems.  
112 Their growth, survival, and reproduction affect other species' ecological functions and  
113 forms within and outside their habitats. There is a high degree of responsiveness  
114 between the vegetation, drought resilience, and microclimatic conditions of forests  
115 and their ecosystems (Eisenhauer et al., 2021). In this study, we observed and  
116 analyzed the monthly xylem water, soil water, precipitation stable isotopes and soil

117 water content of Spruce forest in the eastern Qilian Mountains from April to October  
118 2018 and 2019, and used these data to solve the following problems: (1) Quantify the  
119 contribution rates of soil evaporation and vegetation transpiration to  
120 evapotranspiration of ecosystems; (2) Quantifying the ratio of recirculated water  
121 vapor in precipitation; (3) To investigate the evapotranspiration process and its  
122 influence on production and confluence in the forest belt of Qilian Mountain. This  
123 study provides an effective basis for local water resource use and ecological  
124 protection.

## 125 **2. Study area**

126 The Qilian Mountains are located in the central part of the Eurasian continent, on  
127 the northeastern edge of the Qinghai-Tibet Plateau. The eastern region is dominated  
128 by water erosion, with large variations in mountainous terrain and an average  
129 elevation of over 4,000 meters. Permafrost is developed at elevations of 3,500 to  
130 3,700 meters, and areas above 4,500 meters are characterized by modern glacier  
131 development. The region has a plateau continental climate, with hot summers and  
132 cold winters, strong solar radiation, and large temperature differences between day  
133 and night. The average annual temperature is below 4°C, with extreme highs of  
134 37.6°C and extreme lows of -35.8°C. The annual sunshine hours range from 2,500 to  
135 3,300 hours, with a total solar radiation of 5,916 to 15,000 megajoules per square  
136 meter. The average annual precipitation is 400 millimeters, and the annual  
137 evaporation ranges from 1,137 to 2,581 millimeters. The average wind speed is  
138 around 2 meters per second, and the frost-free period lasts from 23.6 to 193 days. The  
139 Shiyang River originates from the Daxueshan on the northern side of the Lenglong  
140 Ridge in the eastern section of the Qilian Mountains, serving as a major water source  
141 for the city of Wuwei. The soil types in the eastern section are diverse, but with low  
142 organic matter content. The distribution of vegetation shows distinct zonal  
143 characteristics, with mountainous forest-grassland zones (2,600 to 3,400 meters),  
144 subalpine shrub-meadow zones (3,200 to 3,500 meters), and high mountain  
145 sub-ice-snow sparse vegetation zones (>3,500 meters) at elevations above 2,700

146 meters. The main types of natural forest vegetation include Qinghai spruce forest,  
 147 Qilian juniper forest, and Chinese pine forest, with Qinghai spruce being the dominant  
 148 tree species (Zhu et al., 2022).

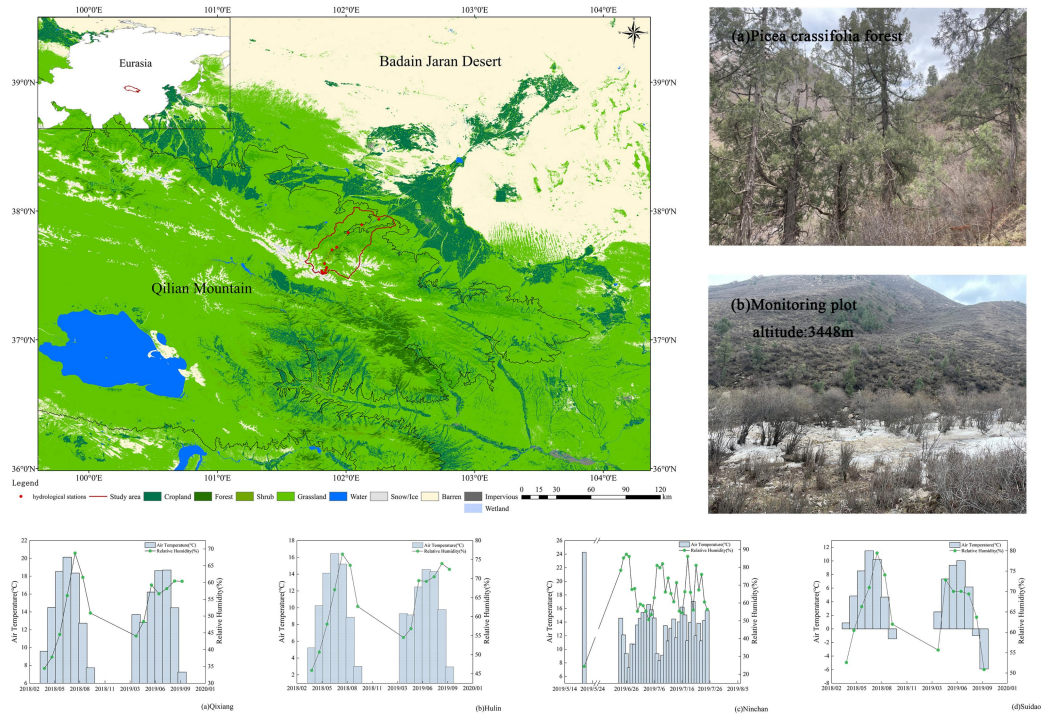

149

150

Figure 1 Location of the study area and changes in meteorological conditions

151 **3. Materials and methods**

152 **3.1 Materials Sources**

153 **3.1.1 Sampling network**

154 **Table 1 Sampling Point Locations and Sample Quantity Information**

| Parameter        | Station                 | Qixiang | Hulin  | Ninchan | Suidao |
|------------------|-------------------------|---------|--------|---------|--------|
| Local climate    | Altitude(m)             | 2543    | 2721   | 3068    | 3448   |
|                  | Temperature(°C/a)       | 3       | 3.2    | 3.3     | -0.9   |
|                  | Precipitation(mm/a)     | 510     | 469.44 | 394     | 475    |
|                  | Relative humidity (%/a) | 52.9    | 56.1   | 66.6    | 69.2   |
| Samplings number | Precipitation           | 53      | 108    | 91      | 135    |
|                  | Soil water              | 220     | 560    | 560     | 560    |
|                  | Xylem water             | 236     | 56     | 56      | 56     |

### 155 3.1.2 Sample collection

156 We use an automatic weather station in 2018 and 2019 to record meteorological  
157 data, in which a rain gauge is used to collect precipitation and transfer samples to  
158 100ml containers after each rain. Drill holes 0 ~ 5 cm, 5 ~ 10 cm, 10 ~ 20 cm, 20 ~ 30  
159 cm, 30 ~ 40 cm, 30 ~ 50 cm, 50 ~ 60 cm, 60 ~ 70 cm, 70 ~ 80 cm, 80 ~ 90 cm, 90 in  
160 the sample plot by using soil drill ~ 100 cm. The soil samples were divided into two  
161 parts, one of which was placed in a 50 ml glass bottle. The bottle was sealed with a  
162 subfilm and transported to the observation station within 10 hours after the sampling  
163 date was marked for cryopreservation to detect stable isotope data. The other part of  
164 the sample was placed in a 50ml aluminum box and the soil moisture content was  
165 determined by drying method. When collecting plant samples, we used scissors to  
166 collect vegetation xylem stems, peeled off the bark, and put them in 50ml glass bottles  
167 sealed and frozen for experimental analysis.

168 We utilized the monthly potential evapotranspiration dataset of China, with a  
169 spatial resolution of 0.0083333° (approximately 1 km), covering the period from  
170 January 1990 to December 2021. The data is measured in units of 0.1 mm. This  
171 dataset is derived from the China 1 km monthly mean temperature, minimum  
172 temperature, and maximum temperature dataset(Peng et al.,2022;Ding et al.,2020;Ding  
173 et al.,2021), using the Hargreaves equation for estimating potential evapotranspiration  
174 (Peng et al., 2017). The formula is as follows:  $P_{ET} = 0.0023 \times S_0 \times (MaxT -$   
175  $MinT)0.5 \times (MeanT + 17.8)$ , where  $P_{ET}$  represents potential evapotranspiration in  
176 mm/month,  $MaxT$ ,  $MinT$ , and  $MeanT$  are the monthly maximum temperature,  
177 minimum temperature, and mean temperature, respectively.  $S_0$  represents the  
178 theoretical solar radiation reaching the top of the Earth's atmosphere, calculated based  
179 on solar constant, distance between Earth and the sun, Julian day, and latitude. For  
180 data storage convenience, the values are stored as int16 type in NETCDF (nc) files.  
181 The surface evapotranspiration data were obtained from the MODIS-based daily  
182 surface evapotranspiration data of the Qilian Mountains (2019), with a spatial  
183 resolution of 0.01° (Yao et al., 2017;Yao et al., 2020) .



## 184 **3.2 Experimental Analysis**

185 The isotopic data used in this study mainly include stable isotopes of  
186 precipitation, soil water, and xylem water. All isotopic samples were analyzed at the  
187 Stable Isotope Laboratory of Northwest Normal University. The precipitation samples  
188 were analyzed for hydrogen and oxygen stable isotopes using a liquid water isotope  
189 analyzer (DLT-100, Los Gatos Research, USA). After thawing the soil and vegetation  
190 samples, they were extracted using a low-temperature vacuum condensation device  
191 (LI-2100, LICA United Technology Limited, China), and the extracted water was  
192 subjected to isotopic analysis. Each water sample was tested six times to ensure  
193 accuracy, with the first two tests considered as interference and only the results of the  
194 subsequent four tests were averaged (Zhu et al., 2022). The isotopic measurements are  
195 represented by  $\delta$ , which represents the deviation in parts per thousand of the ratio of  
196 two stable isotopes in the sample relative to the ratio in a standard sample. The  
197 International Atomic Energy Agency (IAEA) defined the Vienna Standard Mean  
198 Ocean Water (VSMOW) in 1968 as the standard for isotopic composition, which is  
199 derived from distilled seawater and has a similar isotopic composition to Standard  
200 Mean Ocean Water (SMOW).

$$201 \quad \delta = \left( \frac{\delta_{\text{Sampling}}}{\delta_{\text{Standard}}} - 1 \right) \times 1000\% \quad (1)$$

## 202 **3.3 Research methods**

### 203 **3.3.1 Isotopic composition of atmospheric water vapour**

204 The stable isotope composition of moisture in ambient air is calculated as  
205 follows(Gibson and Reid, 2014;Skrzypek et al., 2015):

$$206 \quad \delta_A = \frac{\delta_{\text{rain}} - k \epsilon^+}{1 + k \alpha^+ \times 10^{-3}} \quad (2)$$

207 where  $k=1$ , or by fitting  $k$  to some fraction of 1 as the best fit to the local  
208 evaporation line, is the isotopic fractionation factor. Defined by  $\epsilon^+ = (\alpha^+ -$   
209  $1) \times 1000$ .  $\alpha^+$  about  $^2\text{H}$  and  $^{18}\text{O}$  are calculated as follows(Horita and Wesolowski,  
210 1994):

211  $10^3 \ln^2 \alpha^+ = 1158.8T^3/10^9 - 1620.1T^2/10^6 + 794.84T/10^3 - 161.04 +$   
 212  $2.9992 \times 10^9/T^3$  (3)

213

214  $10^3 \ln^{18} \alpha^+ = -7.685 + 6.7123 \times 10^3/T - 1.6664 \times 10^6/T^2 + 0.35041 \times$   
 215  $10^9/T^3$  (4)

### 216 3.3.2 Isotopic composition of soil evaporation

217 The Craig-Gordon model was used to calculate the stable isotopic composition  
 218 of soil evaporation water vapour,  $\delta_E$ , using the following equation(Craig and Gordon,  
 219 1965;Yepez et al., 2005).

220 
$$\delta_E = \frac{\alpha_e^{-1} \delta_s - h \delta_A - \epsilon_{eq} - (1-h) \epsilon_k}{(1-h) + 10^{-3}(1-h) \epsilon_k}$$
 (5)

221 where  $\alpha_e(>1)$  is the equilibrium factor calculated as a function of water surface  
 222 temperature,  $\delta_s$  is the stable isotopic composition of liquid water at the evaporating  
 223 surface of the soil (0 ~ 10 cm average stable isotopic composition of soil water),  $\delta_A$  is  
 224 the stable isotopic composition of atmospheric water vapour near the surface,  $\epsilon_{eq}$   
 225 represents the equilibrium fractionation corresponding to  $\epsilon_{eq} = (1-1/\alpha_e) \times 1000$ ,  $\epsilon_k$  is  
 226 the kinetic fractionation factor of  $O^2$  is approximately 18.9‰ and h is the atmospheric  
 227 relative humidity(Gibson and Reid, 2010). For  $\delta^{18}O$ ,  $\alpha_e$  is calculated as  
 228 follows(Raz-Yaseef et al., 2010):

229 
$$\alpha_e = \frac{1.137 \times 10^6/T^2 - 0.4156 \times 10^3/T - 2.0667}{1000} + 1$$
 (6)

230 Where T is the soil Kelvin temperature (K) at a depth of 5 cm.

### 231 3.3.3 Isotopic composition of plant transpiration

232 When transpiration is strong, leaf water is in "isotopic stable state", that is, the  
 233 isotopic composition of leaf transpiration water is equivalent to that of water absorbed  
 234 by the roots of rain plants at noon. Therefore, the stable isotopic composition of water  
 235 in plant xylem can be used to represent the stable isotopic composition of water vapor  
 236 in plant transpiration. The expression is as follows(Aron et al., 2020):

237 
$$\delta_T = \delta_X$$
 (7)

238 where  $\delta_x$  is the isotopic ratio of xylem water and  $\delta_T$  is the isotopic ratio of

239 transpiration.

### 240 3.3.4 Evapotranspiration isotope assessment

241 The Keeling Plot model describes the linear relationship between the oxygen  
242 isotope composition of atmospheric water vapour and its reciprocal concentration .  
243 The intercept of the curve on the Y-axis represents the oxygen isotopic composition of  
244 evapotranspiration ( $\delta_{ET}$ ) and is expressed as(Keeling, 1958;Wang et al., 2015):

$$245 \quad \delta_a = \frac{C_b(\delta_b - \delta_{ET})}{C_a} + \delta_{ET} \quad (8)$$

246 Where  $\delta_a$  and  $C_a$  represent the atmospheric water vapour oxygen isotopic  
247 composition (‰) and water vapour concentration in the ecosystem boundary layer,  $\delta_b$   
248 and  $C_b$  represent the background atmospheric water vapour oxygen isotopic  
249 composition and background atmospheric water vapour concentration, and  $\delta_{ET}$  is the  
250 ecosystem evapotranspiration oxygen isotopic composition.

### 251 3.3.5 Ecosystem evapotranspiration partitioning

252 The determination of evapotranspiration by means of biotic and abiotic isotopic  
253 composition can be used to improve the understanding of community structure and  
254 ecosystem function in Qinghai spruce forests in the Qilian Mountains. Based on the  
255 isotope mass balance approach to consider the distribution of major and minor  
256 isotopes, the partitioning of evapotranspiration can be achieved using two  
257 end-member mixing models (E and T) with the following expression(Kool et  
258 al.,2014;Wei et al., 2018):

$$259 \quad \frac{T}{ET} = \frac{\delta_{ET} - \delta_E}{\delta_T - \delta_E} \quad (9)$$

260 where  $\delta_{ET}$ ,  $\delta_E$  and  $\delta_T$  are the isotopic compositions of evapotranspiration (ET),  
261 soil evapotranspiration (E) and plant evapotranspiration (T), respectively, and the  
262 isotopic values of the three can be obtained by both direct observation and model  
263 estimation.

### 264 3.3.6 Three-component mixing model

265 Assuming that precipitation vapor is a mixture of advective water vapour and  
266 recirculating water vapour, it is understood that the proportion of both precipitation  
267 and precipitation water vapour has the same nature. The proportion of precipitation

268 occupied by **advective vapour** is calculated as follow(Kong et al., 2013; Wang et al.,  
 269 2022):

$$270 \quad f_{re} = \frac{P_{tr}+P_{ev}}{P_{tr}+P_{ev}+P_{adv}} \quad (10)$$

271 where  $P_{tr}$ ,  $P_{ev}$  and  $P_{adv}$  are precipitation produced by transpiration, surface  
 272 evaporation and advection, respectively.

273 This can be calculated using the following formula(Brubaker et al., 1993; Sang et  
 274 al., 2023):

$$275 \quad \delta_{pv} = \delta_{tr}f_{tr} + \delta_{ev}f_{ev} + \delta_{adv}f_{adv} \quad (11)$$

$$276 \quad f_{ev} + f_{tv} + f_{adv} = 1 \quad (12)$$

277 where  $f_{tr}$ ,  $f_{ev}$  and  $f_{adv}$  are the proportional contributions of transpiration, surface  
 278 evaporation and advection to precipitation, respectively, and  $\delta_{pv}$ ,  $\delta_{tr}$ ,  $\delta_{ev}$  and  $\delta_{adv}$  values  
 279 are the stable isotopes in precipitating transpiration, transpiration, surface evaporation  
 280 and advective vapour, respectively.  $f_{tr}$ ,  $f_{ev}$  and  $f_{adv}$  are calculated by Isoerror software,  
 281 based on dual isotopes and three sources(Ver. 1.3.1, <https://www.epa.gov/>)(Phillips  
 282 and Gregg, 2001).  $\delta_{pv}$  is calculated using the following formula:

$$283 \quad \delta_{pv} = \frac{\delta_p - k\varepsilon^+}{1 + k\varepsilon^+} \quad (13)$$

284 Using the C-G model to calculate  $\delta_{ev}$ , the formula is as follows:

$$285 \quad \delta_e = \frac{\delta_s/\alpha^+ - h\delta_{adv} - \varepsilon}{1 - h + \varepsilon_k} \quad (14)$$

286 Including the  $\delta_s$  is the isotopic composition of liquid water evaporation front,  
 287  $\delta_{adv}$  is advection steam,  $h$  is relative humidity,  $\alpha^+$  is equilibrium fractionation factor,  $\varepsilon_k$   
 288 is kinetic fractionation factor,  $\varepsilon$  is total fractionation factor.

$$289 \quad \varepsilon = \varepsilon^+/\alpha^+ + \varepsilon_k \quad (15)$$

$$290 \quad \varepsilon_k = (1 - h)\theta_n C_k \quad (16)$$

291  $h$  is the relative humidity,  $C_k$  is the kinetic fractionation constant,  $\delta^2H$  is 25.1‰,  
 292  $\delta^{18}O$  is 28.5‰.The weight coefficient  $\theta$  of small water body is 1, and  $\theta$  of large water  
 293 body is 0.5.  $n$  ranges from 0.5 (fully turbulent transport, with reduced kinetic  
 294 fractionation, suitable for lake or saturated soil conditions) to 1 (fully diffused  
 295 transport, suitable for very dry soil conditions), with a kinetic fractionation coefficient

296 of about 12.2-24.5‰ for  $\epsilon_k$  ( $^2\text{H}$ ) in a dry atmosphere ( $h=0$ ). The kinetic separation  
 297 coefficient of  $\epsilon_k$  ( $^{18}\text{O}$ ) is about 13.8-27.7‰.

298 The advection water vapor isotope  $\delta_{\text{adv}}$  in the three-component mixing model  
 299 needs to be determined by the water vapor isotopic composition at the upwind  
 300 position. Based on the HYSPLIT model, we found that the eastern Qilian Mountains  
 301 was controlled by westerly winds, southeast monsoon and plateau monsoon in June,  
 302 July and August, and by prevailing westerly winds in September and October. The  
 303 clustering analysis of air masses in different months shows that air masses accumulate  
 304 at the northern foot of Qilian Mountains and move from low altitude to high altitude  
 305 along the valley. Xiyang, at 2097 m above sea level, is therefore used as a headwind  
 306 station from April to October. When steam isotopes show a depletion trend along the  
 307 transport path, isotopic fractionation is assumed to be due to Rayleigh distillation, and  
 308 the expression is as follow:

$$309 \quad \delta_{\text{adv}} = \delta_{\text{pv-adv}} + (\alpha^+ - 1)\ln F \quad (17)$$

310 Where  $\delta_{\text{pv-adv}}$  is the isotopic composition in the vapor of the winds tation, and  $F$  is  
 311 the ratio between the final vapor and the initial vapor. Since rainfall is positively  
 312 correlated with the surface vapor pressure of the whole study area ( $c=1.657e$ , where  $c$   
 313 is the water vapor content in mm,  $e$  is the surface vapor pressure in hPa,  $R^2=0.94$ ), we  
 314 used the surface vapor pressure of each site to calculate the value of  $F$ . The  
 315 recirculated water entering the air mass is not considered here, because the  
 316 contribution of recirculated water to the total air column is very limited, and most of  
 317 the available precipitation does not result in rainfall but escapes to other areas. If there  
 318 is no depletion of isotope ratios along the transmission track, the vapor isotope ratio  
 319 from the upwind station is applied directly, and the Rayleigh distillation equation is  
 320 not applied.

321 The  $\delta_p$  is corrected by the local evaporation line (LEL), and the LEL slope  
 322 (SLEL) can be calculated as (Skrzypek et al., 2015):

$$323 \quad S_{\text{LEL}} = \frac{(h-10^{-3} \epsilon)[h(^2\delta_{\text{pv}} - ^2\delta_{\text{p}}) + ^2\epsilon(1+10^{-3} ^2\delta_{\text{pv}})]}{(h-10^{-3} ^2\epsilon)[h(^{18}\delta_{\text{pv}} - ^{18}\delta_{\text{p}}) + ^{18}\epsilon(1+10^{-3} ^{18}\delta_{\text{p}})]} \quad (18)$$

324

325 Where h is the relative humidity,  $\epsilon$  is the total fractionation factor, and  $\delta_{pV}$  and  $\delta_p$   
 326 are the stable isotopic components of water vapor and precipitation. According to our  
 327 research results, the LEL equation for the study area is  $\delta^2H=3.86\delta^{18}O-19.88$   
 328 ( $R^2=0.994$ ,  $P < 0.0001$ ,  $n=19$ ).

## 329 4. Results and analysis

### 330 4.1 Hydrogen and oxygen isotope variations in different water

#### 331 bodies

332 During the growth season of Qinghai spruce, the stable isotopes of precipitation  
 333 exhibit specific patterns of fluctuation (Table 2). In the early stages of growth, the  
 334 hydrogen and oxygen isotope values are generally low. As the temperature gradually  
 335 increases, the extent of water evaporation and loss intensifies, leading to an  
 336 enrichment of stable isotopes. The average  $\delta^2H$  value of precipitation throughout the  
 337 growth season is  $-45.52\text{‰}$ , fluctuating roughly between  $-238.62\text{‰}$  and  $63.43\text{‰}$ . The  
 338 average  $\delta^{18}O$  value is  $-7.75\text{‰}$ , fluctuating roughly between  $-31.49\text{‰}$  and  $14.79\text{‰}$ .  
 339 There is not a significant depletion or enrichment of stable isotopes in the wood  
 340 tissues, with a fluctuation range of  $-76.95\text{‰}$  to  $23.87\text{‰}$  for  $\delta^2H$  and  $-11.92\text{‰}$  to  
 341  $24.77\text{‰}$  for  $\delta^{18}O$ . Shallow soil water shows a less pronounced enrichment of heavy  
 342 isotopes compared to precipitation and wood tissues, with a lower degree of  
 343 fluctuation observed during late spring and the beginning of summer.

344 Table 2 Stable isotopes of different water bodies during the growing season

| Average<br>Period | $\delta^2H/\text{‰}$ |             |                        | $\delta^{18}O/\text{‰}$ |             |                        |
|-------------------|----------------------|-------------|------------------------|-------------------------|-------------|------------------------|
|                   | Precipitation        | Xylem water | Soil water<br>(0~10cm) | Precipitation           | Xylem water | Soil water<br>(0~10cm) |
| 4                 | -69.15               | -39.02      | -53.10                 | -10.25                  | 2.56        | -7.10                  |
| 5                 | -39.09               | -29.78      | -45.38                 | -7.61                   | 4.44        | -6.42                  |
| 6                 | -31.29               | -45.83      | -46.08                 | -5.74                   | -2.83       | -6.12                  |
| 7                 | -32.39               | -47.63      | -47.71                 | -5.33                   | -0.97       | -7.06                  |

|    |        |        |        |        |       |       |
|----|--------|--------|--------|--------|-------|-------|
| 8  | -48.88 | -44.55 | -68.85 | -7.79  | -2.06 | -9.07 |
| 9  | -29.38 | -42.62 | -49.20 | -6.46  | -1.83 | -6.79 |
| 10 | -68.43 | -44.57 | -54.88 | -11.06 | -2.25 | -7.96 |

345

346 LMWL exhibits variations across different vertical gradients, primarily  
 347 influenced by temperature and humidity. It is noteworthy that relative humidity is  
 348 generally low at all four heights within the forest, resulting in local meteoric water  
 349 lines (LMWL) being lower than the global meteoric water line (GMWL). At an  
 350 elevation of 2543m, which represents the lowest layer of tree growth, the temperature  
 351 can reach up to 20°C in July, and the slope of the local meteoric water line (LMWL)  
 352 is 6.74. At 2721m, the average temperature throughout the growing season is 10.4°C,  
 353 with a maximum temperature of 16.45°C in July and an average relative humidity of  
 354 64.38%. The slope of LMWL is 7.02 (Figure 2, d). At the Suidao station located at an  
 355 elevation of 3448m, the slope of the precipitation regression line is 7.75, which is  
 356 close to the slope of the GMWL but exhibits the largest deviation from the local  
 357 evaporation line (Figure 2, a). The soil water line (SWL) in the forest's lower layer is  
 358 smaller and closer to the local evaporation line, indicating stronger evaporative  
 359 fractionation and dynamic fractionation compared to the other three sampling zones.  
 360 The slopes of the SWL are smaller than the slopes of LMWL, indicating that  
 361 precipitation is the main source of soil moisture replenishment.

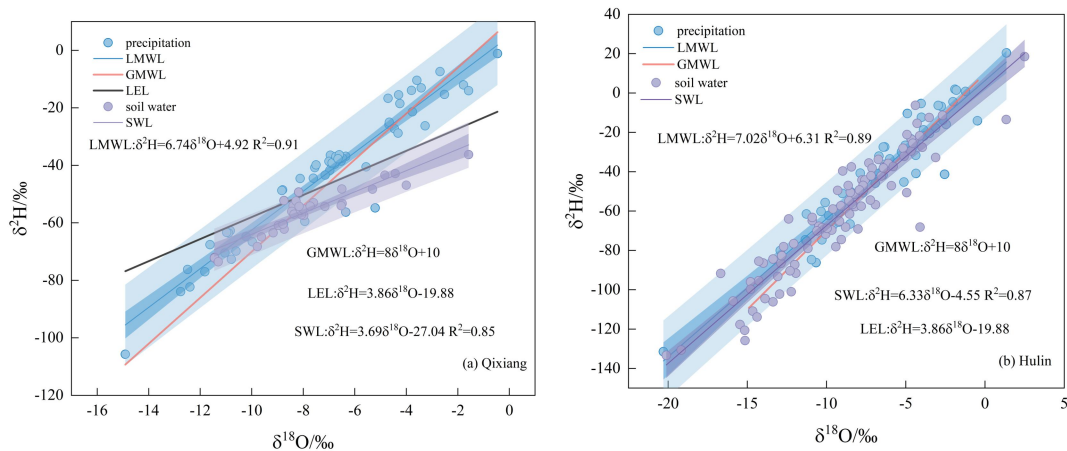

362

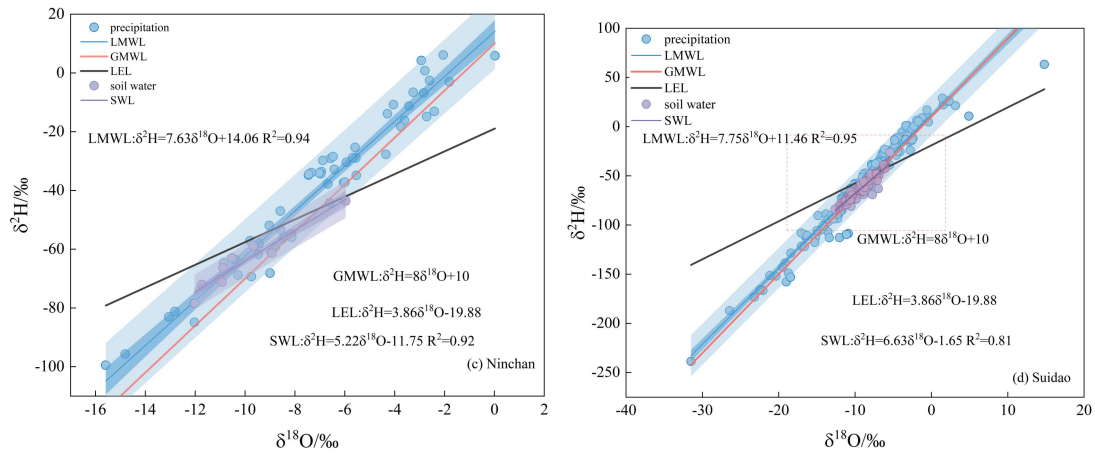

363

364 Figure 2 (a) Hydrogen and oxygen stable isotope linkages, (b) Precipitation and  
 365 oxygen isotope changes in different water bodies.

366 Unsaturated water vapor leads to non-equilibrium fractionation during the  
 367 process of precipitation, with an average d-excess value of 16.58‰ throughout the  
 368 growing season (Figure 3, a). In May and September, due to higher relative humidity  
 369 compared to other periods, the evaporation rate of water vapor is faster. The  
 370 deuterium values show slow fluctuations from June to August, with significant  
 371 fluctuations starting from mid-August, indicating that local evaporation is gradually  
 372 enhanced over time due to the influence of temperature and relative humidity, leading  
 373 to increased non-equilibrium evaporation. The average lc-excess value of  
 374 precipitation in the lower layer of forest distribution is -8.18‰, while the average  
 375 lc-excess value of precipitation in the middle, upper-middle, and canopy layers is  
 376 close to 0. This is because the fractionation effect of evaporation is more pronounced  
 377 at lower elevations. At higher elevations, influenced by rainfall and snowmelt, the soil  
 378 moisture content in all soil layers is above 30% (Figure 3, b). Towards the end of the  
 379 growing season, as temperatures decrease, tree leaves fall to the forest floor, forming  
 380 a litter layer that retains moisture in the soil.

381



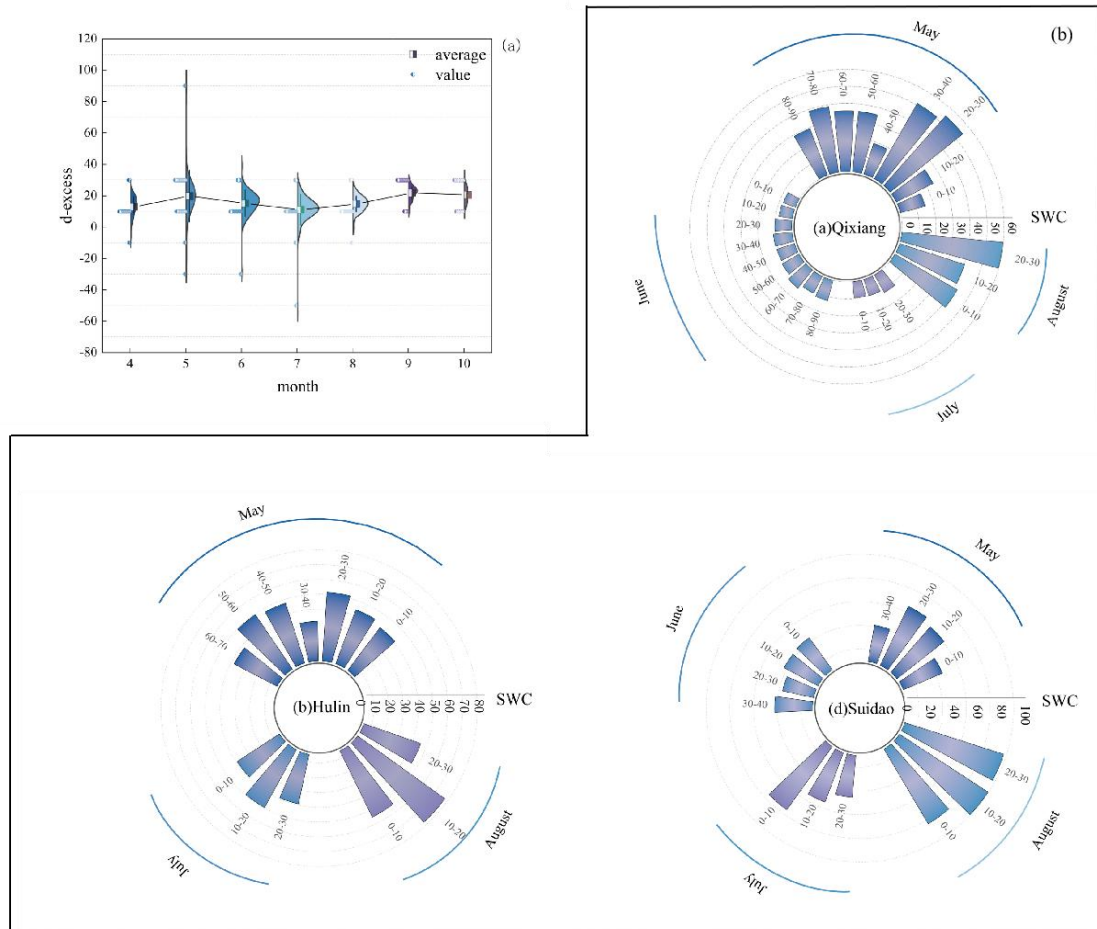

382

383

384 Figure 3 (a) Variation in soil water content, (b) Comparison between atmospheric  
 385 water vapour oxygen isotopes and d-excess

386 **4.2 Soil evaporation, plant transpiration and ecosystem**

387 **evapotranspiration**

388 Table 3 Evaporation and transpiration at different altitudes during the growing season

| Site    | Type          | April  | May    | June   | July   | August | September | October |
|---------|---------------|--------|--------|--------|--------|--------|-----------|---------|
| Qixiang | $\delta_T$    | 2.22   | -5.87  | -4.59  | -0.72  | -1.72  | -1.78     | -2.26   |
|         | $\delta_E$    | -30.32 | -28.68 | -27.33 | -29.12 | -28.68 | -26.32    | -27.27  |
|         | $\delta_{ET}$ | -20.19 | -20.05 | -11.63 | -9.87  | -13.56 | -15.85    | -21.56  |
| Hulin   | $\delta_T$    | -5.34  | -3.58  | -4.13  | -0.34  | -2.35  | -4.25     | -1.97   |
|         | $\delta_E$    | -29.68 | -27.28 | -25.8  | -27.75 | -24.56 | -25.21    | -27.88  |
|         | $\delta_{ET}$ | -21.59 | -22.36 | -8.93  | -10.17 | -11.57 | -18.8     | /       |

|         |               |        |        |        |        |        |        |        |
|---------|---------------|--------|--------|--------|--------|--------|--------|--------|
| Ninchan | $\delta_T$    | /      | -3.45  | -1.98  | -1.05  | -6.68  | /      | /      |
|         | $\delta_E$    | /      | -20.57 | -26.31 | -29.08 | -18.22 | -18.15 | -18.22 |
|         | $\delta_{ET}$ | /      | /      | -12.46 | -7.57  | /      | /      | /      |
| Suidao  | $\delta_T$    | /      | -8.45  | -6.98  | -6.05  | -6.68  | /      | /      |
|         | $\delta_E$    | -29.79 | -27.32 | -27.91 | -23.83 | -28.78 | -25.8  | -28.06 |
|         | $\delta_{ET}$ | -24.31 | -16.14 | -15.19 | -10.07 | -18.05 | -23.02 | -18.65 |

389 The Keeling plot method was used to analyze the stable isotope composition of  
390 ecosystem evapotranspiration (Figure 4). Its principle involves linearly fitting the  
391 water vapor concentration in the ecosystem boundary layer against the oxygen isotope  
392 composition, with the intercept on the y-axis representing the stable isotope value of  
393  $\delta_{ET}$ . The results indicate that at different heights within the distribution of deciduous  
394 trees, the average  $\delta_{ET}$  value is -22.59‰. Throughout the entire growing season,  $\delta_{ET}$   
395 does not consistently decrease with increasing elevation. Specifically, near the treeline,  
396 there are higher stable isotope values, but in the middle and upper layers of the forest,  
397 there is a minimal value, indicating lower and less stable isotopic fractionation in that  
398 layer. At an elevation of 3448m, as the number of deciduous trees decreases and  
399 shrubs become dominant, the  $\delta_{ET}$  value is -21.81‰(Table 3). We found that the stable  
400 isotope  $\delta_E$  of soil evaporation at depths of 0-10cm is more enriched at lower  
401 elevations, particularly in April and May when the isotopic enrichment is more  
402 pronounced. From June to August, due to a significant increase in vegetation coverage,  
403 soil evaporation intensity decreases. In the early stage of the growing season, when  
404 leaves have not fully developed, the stable isotope composition of the xylem exhibits  
405 a relatively depleted characteristic. In July and August, when leaves are fully  
406 expanded, temperatures rise, and the rainy season in mountainous areas commences,  
407 transpiration becomes more intense.

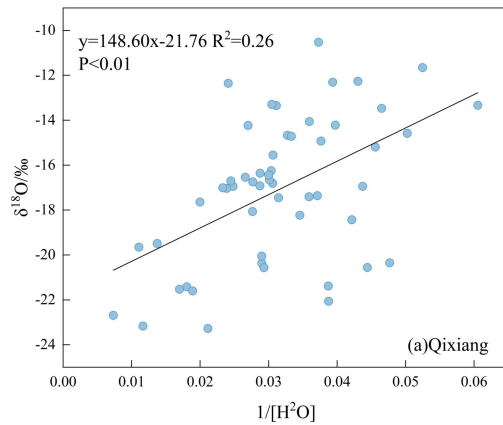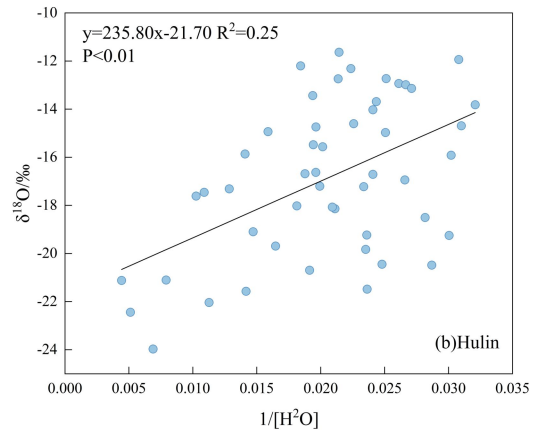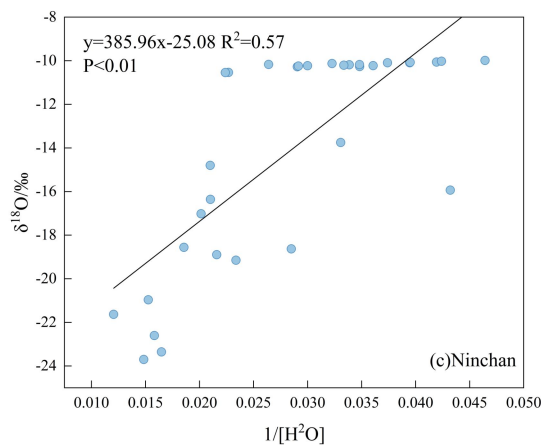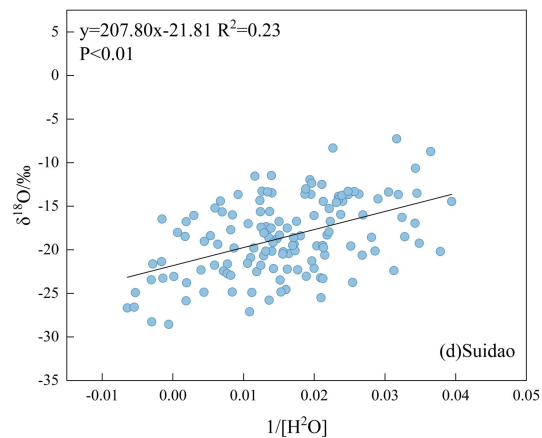

408

409

410

411

Figure 4 Each sampling point is fitted with a trend line based on the Keeling plot method

### 412 4.3 T/ET assessment of Qinghai spruce forest ecosystem in different 413 months

414 We found that the canopy closure of deciduous trees significantly influences the  
415 evapotranspiration of the entire ecosystem (Figure 5). In April and May, as  
416 temperatures rise, surface vegetation exhibits weaker growth, resulting in a higher  
417 proportion of soil evaporation within the ecosystem, while transpiration by vegetation  
418 remains relatively low. During the rainy season in June to August, vegetation  
419 experiences vigorous growth, and transpiration reaches its peak in July. In September  
420 and October, soil evaporation becomes more dominant as temperatures, relative  
421 humidity, and rainfall gradually decrease, and deciduous tree leaves become wilted.  
422 At lower elevations, the T/ET ratio fluctuates between 0.20 and 0.70 in a distinct  
423 pattern, while above the treeline, transpiration ratios fluctuate between 0.20 and 0.80

424 in a similar pattern. Overall, summer is characterized as the peak season for  
 425 transpiration, with a minimal contribution from soil evaporation.

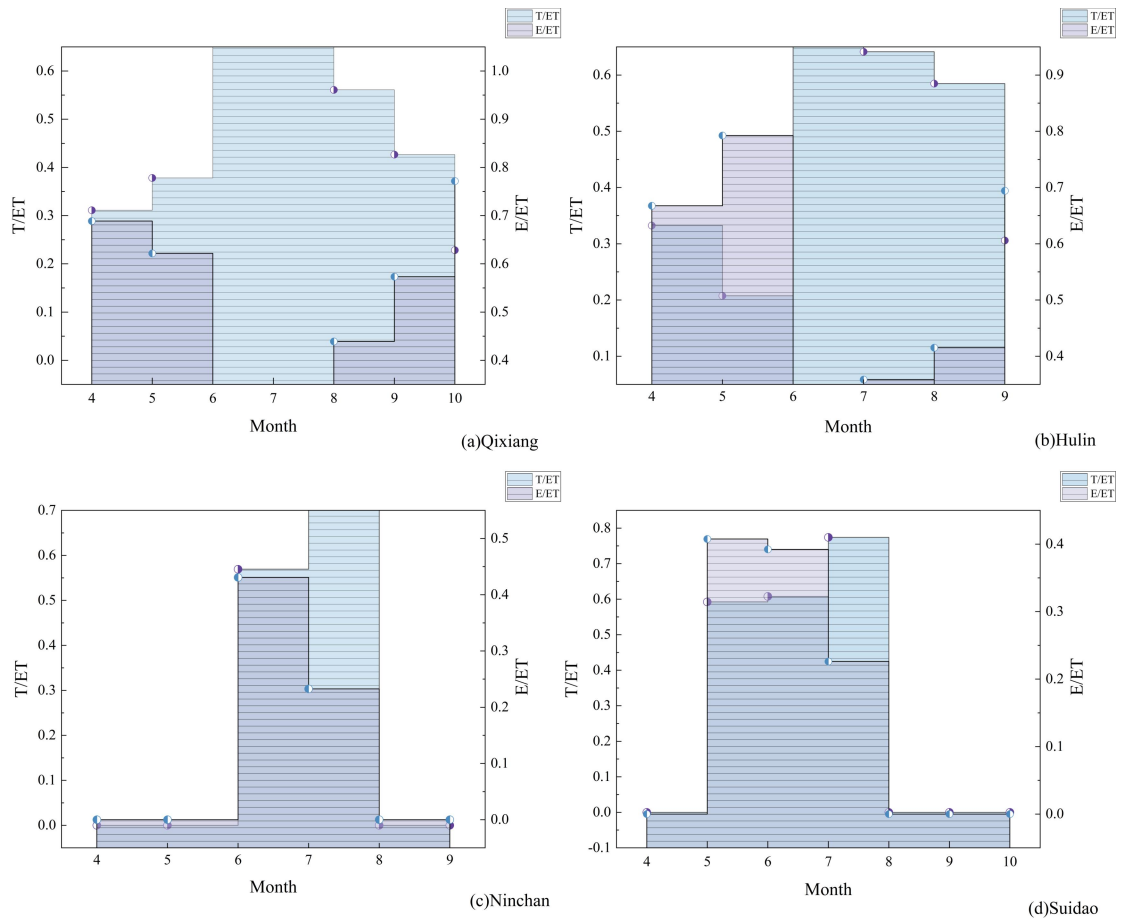

426  
 427 Figure 5 The proportion of soil evaporation and vegetation transpiration in  
 428 evapotranspiration of ecosystem(0 represents missing data)

429 **5. Discussions**

430 **5.1 Hydrological effects of changes in evapotranspiration**

431 **5.1.1 Impact on surface runoff**

432 Comparing the differences of monthly potential evapotranspiration, surface  
 433 evapotranspiration and precipitation in spruce forests (Table 4), the results clearly  
 434 showed that rainfall fluctuated between 0-16mm, and the maximum rainfall was 15.7  
 435 mm in April, while the minimum value of surface evapotranspiration is 41.8 mm and  
 436 the minimum value of potential evapotranspiration is 44.1mm. The difference

437 between  $ET_p$  and ET shows that there is no effective water accumulation in all months.  
 438 From this, an important conclusion can be drawn: **due to the late arrival of the rainy**  
 439 **season in mountainous areas and the uneven distribution of rainfall across different**  
 440 **altitudinal gradients, surface runoff can not be collected in this area, which also**  
 441 **proves that afforestation in this area will further enhance evapotranspiration, posing a**  
 442 **threat to water distribution and utilisation.**

443 Table 4 Month-by-month comparison of potential evapotranspiration, surface  
 444 evapotranspiration and rainfall

| Month      | 4    | 5    | 6     | 7     | 8     | 9    | 10   |
|------------|------|------|-------|-------|-------|------|------|
| $ET_p$ /mm | 76.6 | 87.6 | 106.5 | 128.3 | 118.1 | 80.0 | 44.1 |
| ET/mm      | 51.5 | 66.3 | 93.3  | 108.9 | 110.7 | 81.2 | 41.8 |
| P/mm       | 15.7 | 8.8  | 0     | 13.2  | 13.3  | 11.2 | 13.6 |

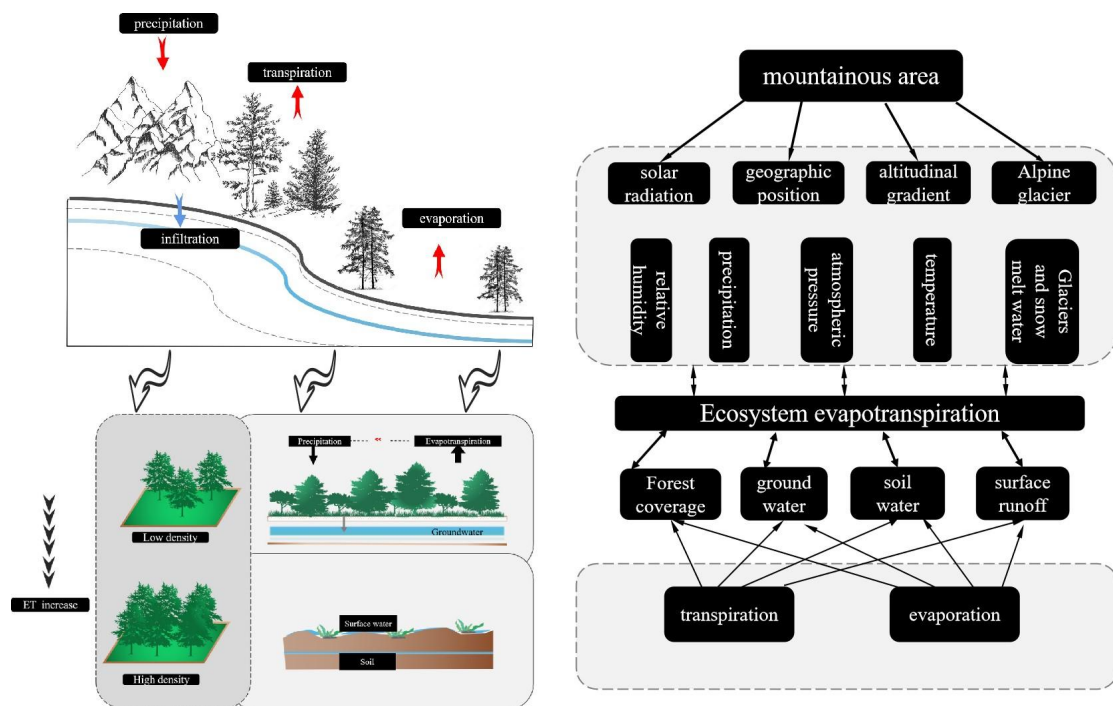

445  
 446  
 447  
 448  
 449

**Figure 6 Conceptual model of the hydrological effects of changes in evapotranspiration**

450 Some studies suggested that reducing forest density will result in less ET in  
451 seasonally dry forests. That reduced ET can be converted into increased groundwater  
452 and runoff to supply downstream social water (Wyatt, O'Donnell, & Springer, 2015).  
453 It has also been claimed that in some cases, the transient increase in water availability  
454 through reduced forest density can actually contribute to subsequent increases in  
455 vegetation cover and ultimately reduce runoff (Tague et al., 2019). By assessing the  
456 hydrological effects of afforestation through the water cycle in the Asia-Pacific region,  
457 it was found that in 7 of the 15 water-deficient areas, positive effects such as  
458 increased yield, precipitation, soil moisture and reduced drought risk were achieved  
459 through afforestation, and it was confirmed that the water-water cycle had a strong  
460 impact and evapotranspiration was increased (Teo et al., 2021). The water vapour  
461 content **produced** by forest transpiration is much higher than that lost by soil surface  
462 evaporation, most of the precipitation is intercepted and infiltrated by surface  
463 vegetation, and part of the soil water involved in infiltration is absorbed by the root  
464 zone of vegetation(Figure 6). Because of plants' high interception and evaporation  
465 ability and the absorption of groundwater by root zone, the proportion of transpiration  
466 was significantly higher than that of evaporation(Su et al., 2014). In this case, the  
467 groundwater amount decreases gradually with the T value increase. Under the  
468 influence of precipitation loss mainly due to plant transpiration, groundwater yield in  
469 this region decreases greatly, and has no significant contribution to the downstream  
470 water revenue.

### 471 **5.1.2 Contribution to recirculating water vapour in precipitation**

472 Our previous study in the eastern section of the Qilian Mountains (Zhang et al.,  
473 2021) indicated that above an altitude of 2100m, air masses gather from the northern  
474 foothills and move along the valley from low to high elevations. From June to August,  
475 the atmospheric circulation is influenced by westerlies, southeast monsoons, and  
476 plateau monsoons, while from September to October, the westerlies are the dominant  
477 factor. Therefore, we selected the Xiying station at an altitude of 2097m as our  
478 upwind site. The  $\delta_{pv}$  values showed depletion in April and October, gradually

479 enriching from June to August. The maximum  $\delta^2\text{H}$  value was -76.02‰ (Table 5), and  
 480 the minimum was -184.93‰, while the maximum  $\delta^{18}\text{O}$  value was -11.89‰, and the  
 481 minimum was -26.38‰. Above 2700 meters, there is a gradual decrease in  
 482 precipitation vapor with increasing altitude. The  $\delta_{\text{ev}}$  values exhibited significant  
 483 fluctuations throughout each month, with different patterns at different locations. At  
 484 2721m, the  $\delta_{\text{ev}}$  range varied between -172.3‰ and 96.39‰. From the forest's lower  
 485 layer to the upper layer, the isotopic composition of the advected moisture from the  
 486 valley gradually diminished, resulting in decreasing values of  $\delta_{\text{adv}}$ .

487 Table 5 Isotopic Composition of Precipitation Vapor, Surface Evaporation Vapor, and  
 488 Vegetation Transpiration Vapor at Different Months and Altitudes

| Month   | Type                  | isotope                        | April   | May     | June    | July    | August  | September | October |
|---------|-----------------------|--------------------------------|---------|---------|---------|---------|---------|-----------|---------|
| Qixiang | $\delta_{\text{pv}}$  | $\delta^2\text{H}/\text{‰}$    | -141.95 | -123.83 | -99.87  | -115.99 | -128.34 | -120.9    | -152.43 |
|         |                       | $\delta^{18}\text{O}/\text{‰}$ | -19.27  | -16.58  | -14.04  | -15.91  | -18.6   | -17.22    | -22.34  |
|         | $\delta_{\text{ev}}$  | $\delta^2\text{H}/\text{‰}$    | -       | -125.69 | -123.69 | -117.98 | -134.57 | -         | -       |
|         |                       | $\delta^{18}\text{O}/\text{‰}$ | -       | -30.21  | -29.56  | -28.62  | -31.19  | -         | -       |
|         | $\delta_{\text{tr}}$  | $\delta^2\text{H}/\text{‰}$    | -39.9   | -29.32  | -46.19  | -49.58  | -45.15  | -42.66    | -44.64  |
|         |                       | $\delta^{18}\text{O}/\text{‰}$ | 2.22    | -5.87   | -4.59   | -0.72   | -1.72   | -1.78     | -2.26   |
|         | $\delta_{\text{adv}}$ | $\delta^2\text{H}/\text{‰}$    | -145.57 | -83.25  | -81.12  | -92     | -109.62 | -100.53   | -122.62 |
|         |                       | $\delta^{18}\text{O}/\text{‰}$ | -20.24  | -11.93  | -10.73  | -12.06  | -15.31  | -13.46    | -18.16  |
| Hulin   | $\delta_{\text{pv}}$  | $\delta^2\text{H}/\text{‰}$    | -129.93 | -123.29 | -98.68  | -113.98 | -124.16 | -118.52   | -164.82 |
|         |                       | $\delta^{18}\text{O}/\text{‰}$ | -17.54  | -16.62  | -13.18  | -15.48  | -17.33  | -17.88    | -22.46  |
|         | $\delta_{\text{ev}}$  | $\delta^2\text{H}/\text{‰}$    | -114.24 | -117.01 | -107.75 | -123.44 | -106.92 | -96.39    | -172.3  |
|         |                       | $\delta^{18}\text{O}/\text{‰}$ | -14.77  | -16.35  | -15.03  | -16.7   | -14.53  | -12.78    | -24.82  |
|         | $\delta_{\text{tr}}$  | $\delta^2\text{H}/\text{‰}$    | -24.12  | -39.62  | -35.97  | -26.44  | -35.85  | -38.39    | -40.53  |
|         |                       | $\delta^{18}\text{O}/\text{‰}$ | -5.34   | -3.58   | -4.13   | -0.34   | -2.35   | -4.25     | -1.97   |
|         | $\delta_{\text{adv}}$ | $\delta^2\text{H}/\text{‰}$    | -112.79 | -115.67 | -106.61 | -122.19 | -106.49 | -95.7     | -170.54 |
|         |                       | $\delta^{18}\text{O}/\text{‰}$ | -14.59  | -16.15  | -14.88  | -16.54  | -14.46  | -12.69    | -24.57  |
| Ninchan | $\delta_{\text{pv}}$  | $\delta^2\text{H}/\text{‰}$    | -       | -76.02  | -139.21 | -135.74 | -129.96 | -113.71   | -184.93 |
|         |                       | $\delta^{18}\text{O}/\text{‰}$ | -       | -11.89  | -19.87  | -18.7   | -17.91  | -16.77    | -26.38  |
|         | $\delta_{\text{ev}}$  | $\delta^2\text{H}/\text{‰}$    | -       | -83.76  | -81.42  | -92.42  | -110.24 | -101.11   | -123.42 |
|         |                       | $\delta^{18}\text{O}/\text{‰}$ | -       | -12.01  | -10.76  | -12.09  | -15.37  | -13.49    | -18.27  |
|         | $\delta_{\text{tr}}$  | $\delta^2\text{H}/\text{‰}$    | -       | -25.58  | -46.77  | -37.77  | -43.66  | -         | -       |
|         |                       | $\delta^{18}\text{O}/\text{‰}$ | -       | -3.45   | -1.98   | -1.05   | -6.68   | -         | -       |
|         | $\delta_{\text{adv}}$ | $\delta^2\text{H}/\text{‰}$    | -162.36 | -113.49 | -111.45 | -106.16 | -122.12 | -114.67   | -141.33 |
|         |                       | $\delta^{18}\text{O}/\text{‰}$ | -22.73  | -15.94  | -15.28  | -14.46  | -16.96  | -16.58    | -20.42  |
| Suidao  | $\delta_{\text{pv}}$  | $\delta^2\text{H}/\text{‰}$    | -167.86 | -128.08 | -124.95 | -117.32 | -137.73 | -130.44   | -155.52 |

|                       |                                |         |         |         |         |         |         |         |
|-----------------------|--------------------------------|---------|---------|---------|---------|---------|---------|---------|
|                       | $\delta^{18}\text{O}/\text{‰}$ | -22.9   | -18.02  | -17.28  | -16.04  | -19.09  | -18.64  | -21.59  |
| $\delta_{\text{ev}}$  | $\delta^2\text{H}/\text{‰}$    | -164.16 | -114.52 | -112.37 | -106.9  | -122.96 | -115.47 | -142.85 |
|                       | $\delta^{18}\text{O}/\text{‰}$ | -22.98  | -16.07  | -15.41  | -14.56  | -17.08  | -16.69  | -20.64  |
| $\delta_{\text{tr}}$  | $\delta^2\text{H}/\text{‰}$    | -       | -25.58  | -46.77  | -37.77  | -43.66  | -       | -       |
|                       | $\delta^{18}\text{O}/\text{‰}$ | -       | -8.45   | -6.98   | -6.05   | -6.68   | -       | -       |
| $\delta_{\text{adv}}$ | $\delta^2\text{H}/\text{‰}$    | -162.38 | -113.51 | -111.47 | -106.18 | -122.14 | -114.69 | -141.36 |
|                       | $\delta^{18}\text{O}/\text{‰}$ | -22.73  | -15.94  | -15.28  | -14.47  | -16.97  | -16.58  | -20.42  |

489 In July, the ratio of vegetation transpiration to precipitation vapor is significantly  
490 higher compared to other months. The temperatures in the lower layers of the forest  
491 are relatively high, and the middle to upper layers are densely populated with spruce,  
492 resulting in a higher  $f_{\text{tr}}$  (transpiration ratio) throughout the entire growing season. Both  
493 the early and late stages of the growing season exhibit noticeably higher  $f_{\text{ev}}$   
494 (evaporation ratio) compared to other months, with the middle and upper parts of the  
495 forest having a higher proportion of evaporated vapor. The average  $f_{\text{adv}}$  (advected  
496 vapor ratio) is 72%, with contributions exceeding 70% for all months except June and  
497 July (Figure 7).



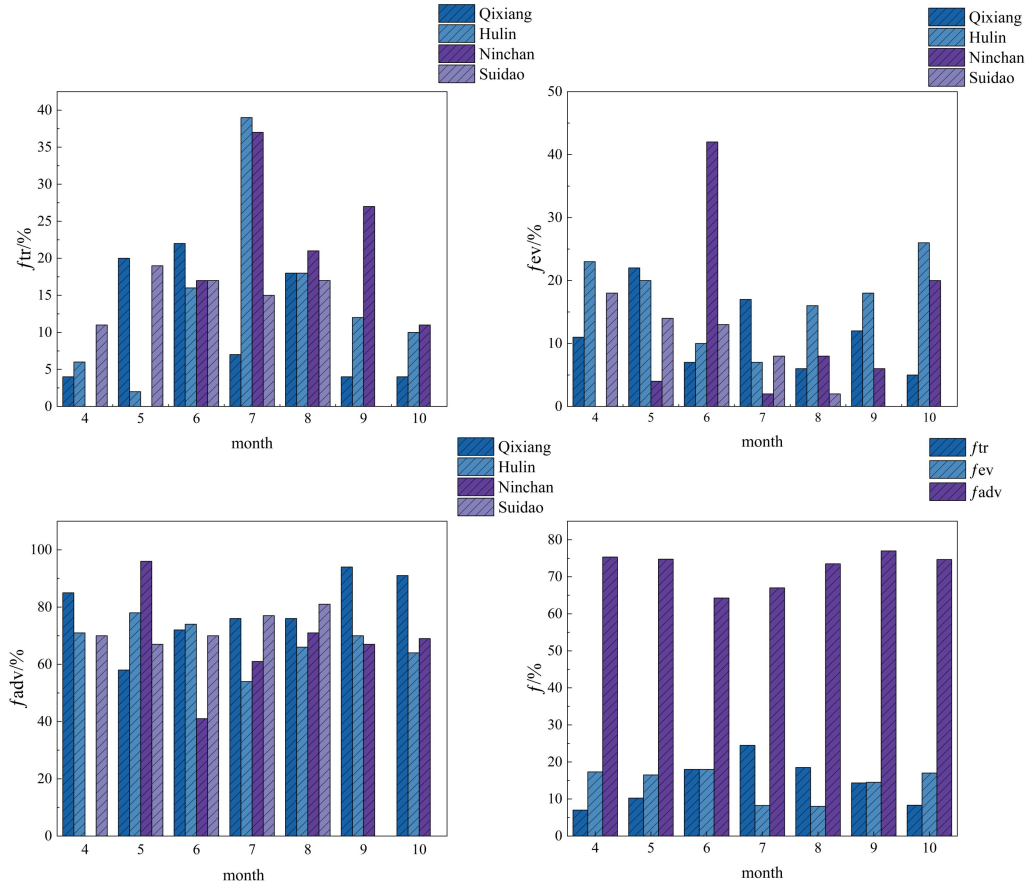

498

499 Figure 7 Comparison of  $f_{adv}$  (advective water vapour contribution),  $f_{ev}$  (surface  
500 evaporation water vapour contribution) and  $f_{tr}$  (plant transpiration water vapour  
501 contribution) for each of period

## 502 5.2 Uncertainty analysis

503 A higher sample size can reduce the margin of error. Therefore, we utilized  
504 isotopic data from four sites over a two-year period to evaluate the model. We  
505 used 404 xylem samples to calculate the contribution ratio of transpiration to  
506 ecosystem evapotranspiration. We examined the uncertainty of the model  
507 evaluation. When analyzing the evaporation characteristics in a semi-arid natural  
508 environment using the Craig-Gordon isotopic model, we first eliminated the  
509 influence of solar radiation and other meteorological variables on the calculation  
510 results. We focused on temperature, relative humidity, water vapor, and the initial  
511 isotopic values of water bodies. Particularly in semi-arid environments, the

512 variations in temperature and relative humidity are crucial (Hernández-Pérez et al.,  
513 2020). To verify the calculation results, we found a strong correlation between the  
514 isotopes of soil evaporation and relative humidity, as demonstrated by the fitting  
515 of  $\delta_E$  against relative humidity and temperature. This also indicates the reliability  
516 of the results obtained through the Craig-Gordon isotopic model. We employed  
517 the Keeling plot method to calculate  $\delta_{ET}$ , which is based on isotopic mass balance  
518 and a two-endmember mixing model. This method assumes that the isotopic  
519 composition of the background atmosphere and source remains constant, with a  
520 very low probability of isotopic spatial variation (Good et al., 2012; Kool et al.,  
521 2014). Due to the higher reliability of oxygen isotopes compared to hydrogen  
522 isotopes (Han et al., 2022; Kale et al., 2022), we solely used oxygen isotopes to  
523 calculate the T/ET values. The results indicate that transpiration significantly  
524 outweighs evaporation during July and August, which aligns with previous  
525 research findings (Zhu et al., 2022). The correlation between T/ET and soil  
526 moisture content suggests that soil moisture is a crucial factor driving the  
527 variations in transpiration and evaporation ratios. Additionally, the estimation of  
528 isotopic composition of advected water vapor from the upwind sites contributes to  
529 increased uncertainty. In our study area, the sites are predominantly influenced by  
530 valley winds, with water vapor moving from the valley bottom to higher altitudes.  
531 Therefore, we selected lower elevation areas in the valley bottom as the source  
532 region for advected water vapor (Zhang et al., 2021).

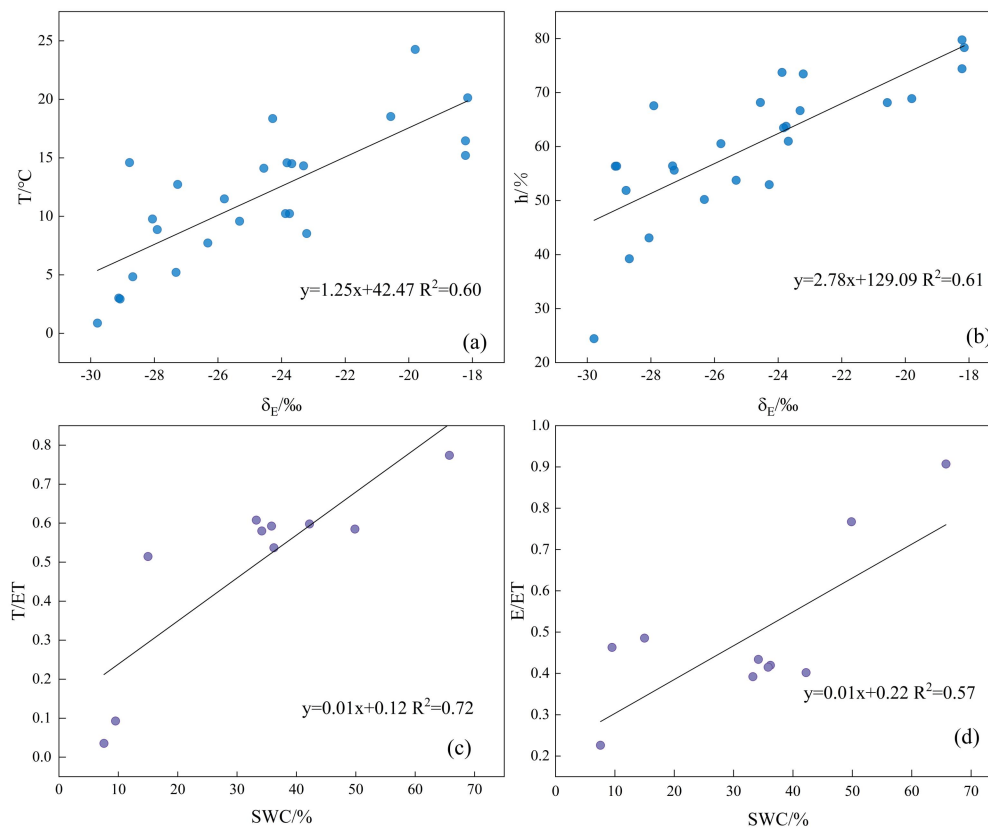

533

534 Figure 8 Correlation analysis of factors affecting uncertainty in impact assessment

535 **6 Conclusions**

536 This study utilizes isotopic data obtained from field observations during  
 537 2018-2019, combined with model simulations, to elucidate the mechanisms of  
 538 evapotranspiration in the Qilian Mountains' spruce forests. The aim is to clarify  
 539 the connection between evapotranspiration and local water cycling, as well as its  
 540 hydrological effects. Isotopic methods were employed to assess T/ET  
 541 (transpiration over evapotranspiration). The results indicate that July and August  
 542 are the peak transpiration seasons for spruce, as they rely on favorable rainfall and  
 543 thermal conditions. Both evaporation and transpiration are more intense during  
 544 these months compared to other months, suggesting that transpiration by spruce  
 545 trees is more significant than soil evaporation. Further quantification of the  
 546 respective contributions of plant transpiration and soil evaporation to  
 547 evapotranspiration reveals an average T/ET value of 0.57 during the study period,  
 548 with a maximum value of 0.77 in July. Thus, it can be concluded that transpiration

549 by forest trees constitutes the main component of evapotranspiration in the  
550 Qinghai spruce forest ecosystem. Analyzing the hydrological effects of spruce  
551 forest evapotranspiration, it is found that the evapotranspiration amount in each  
552 month is at least three times greater than the precipitation. Therefore, surface  
553 runoff formation in this area is challenging to rely on due to the significant  
554 influence of transpiration and evaporation. Comparing the contribution ratios of  
555 atmospheric water vapor from precipitation during spring, summer, and autumn,  
556 the results demonstrate that the period from June to August serves as the peak  
557 transpiration season for spruce forests, with plant transpiration accounting for as  
558 much as 25% of the total atmospheric water vapor, while surface evaporation  
559 contributes only 18%. In the context of global warming, drought and water  
560 scarcity, as well as climate changes dominated by relative humidity, have altered  
561 the ecological communities, ecosystem functions, ecosystem services, and  
562 land-climate interactions of spruce forests. Therefore, it is crucial to understand  
563 that the depletion of rainfall in this forest belt through evapotranspiration is vital  
564 for local water resource allocation and ecological conservation.

## 565 **Acknowledgements**

566 This research was financially supported by the National Natural Science  
567 Foundation of China (41867030, 41971036). The authors much thank the colleagues  
568 in the Northwest Normal University for their help in fieldwork, laboratory analysis,  
569 data processing.

## 570 **Data availability statement**

571 The data that support the findings of this study are available on request from the  
572 corresponding author, stable isotope data are not publicly available due to privacy or  
573 ethical restrictions. Potential evapotranspiration and surface evapotranspiration data  
574 are available from the National Tibetan Plateau Scientific Data Centre(TPDC).

## 575 **Competing Interests**

576 We undersigned declare that this manuscript entitled “Hydrological effects of  
577 evapotranspiration in the Qilian Mountains forest belt” is original, has not been  
578 published before and is not currently being considered for publication elsewhere.

579 The authors declare that they have no known competing financial interests or  
580 personal relationships that could have appeared to influence the work reported in this  
581 paper.

## 582 **References**

- 583 Anderegg W R L, Kane J M, Anderegg L D L. Consequences of widespread tree mortality  
584 triggered by drought and temperature stress[J]. *Nature climate change*, 2013, 3(1):  
585 30-36.
- 586 Aron P G, Poulsen C J, Fiorella R P, et al. An isotopic approach to partition  
587 evapotranspiration in a mixed deciduous forest[J]. *Ecohydrology*, 2020, 13(6):  
588 e2229.
- 589 Ault T R. On the essentials of drought in a changing climate[J]. *Science*, 2020, 368(6488):  
590 256-260.
- 591 Brubaker K L, Entekhabi D, Eagleson P S. Estimation of continental precipitation  
592 recycling[J]. *Journal of Climate*, 1993, 6(6): 1077-1089.
- 593 Chang Y, Ding Y, Zhang S, et al. Dynamics and environmental controls of  
594 evapotranspiration for typical alpine meadow in the northeastern Tibetan Plateau[J].  
595 *Journal of Hydrology*, 2022, 612: 128282.
- 596 Chen H, Zhu G, Shang S, et al. Uncertainties in partitioning evapotranspiration by two  
597 remote sensing-based models[J]. *Journal of Hydrology*, 2022, 604: 127223.
- 598 Craig H, Gordon L I. Deuterium and oxygen 18 variations in the ocean and the marine  
599 atmosphere[J]. 1965.

600 Cui Y, Jia L, Fan W. Estimation of actual evapotranspiration and its components in an  
601 irrigated area by integrating the Shuttleworth-Wallace and surface  
602 temperature-vegetation index schemes using the particle swarm optimization  
603 algorithm[J]. *Agricultural and Forest Meteorology*, 2021, 307: 108488.

604 Díaz S, Kattge J, Cornelissen J H C, et al. The global spectrum of plant form and  
605 function[J]. *Nature*, 2016, 529(7585): 167-171.

606 Ding, Y.X., & Peng, S.Z. (2020). Spatiotemporal trends and attribution of drought across  
607 China from 1901–2100. *Sustainability*, 12(2), 477.

608 Ding, Y.X., Peng, S.Z. (2021). Spatiotemporal change and attribution of potential  
609 evapotranspiration over China from 1901 to 2100. *Theoretical and Applied  
610 Climatology*. <https://doi.org/10.1007/s00704-021-03625-w>.

611 Eisenhauer N, Weigelt A. Ecosystem effects of environmental extremes[J]. *Science*, 2021,  
612 374(6574): 1442-1443.

613 Gao, C. J. (2018). Regional differences in land-atmosphere coupling and possible impacts  
614 of soil moisture over Eastern China. *Nanjing University of Information Science &  
615 Technology (In Chinese)*.

616 Gibson J J, Reid R. Stable isotope fingerprint of open-water evaporation losses and  
617 effective drainage area fluctuations in a subarctic shield watershed[J]. *Journal of  
618 Hydrology*, 2010, 381(1-2): 142-150.

619 Gibson J J, Reid R. Water balance along a chain of tundra lakes: A 20-year isotopic  
620 perspective[J]. *Journal of Hydrology*, 2014, 519: 2148-2164.

621 Good S P, Soderberg K, Wang L, et al. Uncertainties in the assessment of the isotopic  
622 composition of surface fluxes: A direct comparison of techniques using laser-based  
623 water vapor isotope analyzers[J]. *Journal of Geophysical Research: Atmospheres*,  
624 2012, 117(D15).

625 Goodwell A E, Kumar P, Fellows A W, et al. Dynamic process connectivity explains  
626 ecohydrologic responses to rainfall pulses and drought[J]. *Proceedings of the*

627 National Academy of Sciences, 2018, 115(37): E8604-E8613.

628 Han J, Tian L, Cai Z, et al. Season-specific evapotranspiration partitioning using dual  
629 water isotopes in a *Pinus yunnanensis* ecosystem, southwest China[J]. *Journal of*  
630 *Hydrology*, 2022, 608: 127672.

631 Hernández-Pérez E, Levresse G, Carrera-Hernández J, et al. Short term evaporation  
632 estimation in a natural semiarid environment: New perspective of the Craig–Gordon  
633 isotopic model[J]. *Journal of Hydrology*, 2020, 587: 124926.

634 Horita J, Wesolowski D J. Liquid-vapor fractionation of oxygen and hydrogen isotopes of  
635 water from the freezing to the critical temperature[J]. *Geochimica et Cosmochimica*  
636 *Acta*, 1994, 58(16): 3425-3437.

637 Kale Celik S, Madenoglu S, Turker U. Partitioning evapotranspiration of winter wheat  
638 based on oxygen isotope approach under different irrigation regimes[J]. *Irrigation*  
639 *and Drainage*, 2022, 71(4): 882-896.

640 Keeling C D. The concentration and isotopic abundances of atmospheric carbon dioxide  
641 in rural areas[J]. *Geochimica et cosmochimica acta*, 1958, 13(4): 322-334.

642 Kong Y, Pang Z, Froehlich K. Quantifying recycled moisture fraction in precipitation of  
643 an arid region using deuterium excess[J]. *Tellus B: Chemical and Physical*  
644 *Meteorology*, 2013, 65(1): 19251.

645 Kool D, Agam N, Lazarovitch N, et al. A review of approaches for evapotranspiration  
646 partitioning[J]. *Agricultural and forest meteorology*, 2014, 184: 56-70.

647 Li Q, Ye A, Zhang Y, et al. The peer-to-peer type propagation from meteorological  
648 drought to soil moisture drought occurs in areas with strong land-atmosphere  
649 interaction[J]. *Water Resources Research*, e2022WR032846.

650 Li X, Liang S, Yuan W, et al. Estimation of evapotranspiration over the terrestrial  
651 ecosystems in China[J]. *Ecohydrology*, 2014, 7(1): 139-149.

652 Liu Y, Lian J, Luo Z, et al. Spatiotemporal variations in evapotranspiration and  
653 transpiration fraction following changes in climate and vegetation in a karst basin of

654 southwest China[J]. *Journal of Hydrology*, 2022, 612: 128216.

655 Liu Y, Zhuang Q, Miralles D, et al. Evapotranspiration in Northern Eurasia: Impact of  
656 forcing uncertainties on terrestrial ecosystem model estimates[J]. *Journal of*  
657 *Geophysical Research: Atmospheres*, 2015, 120(7): 2647-2660.

658 Maxwell R M, Condon L E. Connections between groundwater flow and transpiration  
659 Partitioning [J]. *Science*, 2016, 353(6297): 377-380.

660 Peng W L, Zhao L J, Xie C, et al. Et segmentation of Picea Qinghai forest ecosystem in  
661 the upper reaches of Heihe River [J]. *Journal of Glaciology and Geocryology*, 2020,  
662 42(2): 629-640.

663 Peng, S. (2022). 1 km monthly potential evapotranspiration dataset in China (1990-2021).  
664 National Tibetan Plateau Data Center, 2022. DOI: 10.11866/db.loess.2021.001.

665 Peng, S.Z., Ding, Y.X., Liu, W.Z., & Li, Z. (2019). 1 km monthly temperature and  
666 precipitation dataset for China from 1901 to 2017. *Earth System Science Data*, 11,  
667 1931–1946. <https://doi.org/10.5194/essd-11-1931-2019>.

668 Peng, S.Z., Ding, Y.X., Wen, Z.M., Chen, Y.M., Cao, Y., & Ren, J.Y. (2017).  
669 Spatiotemporal change and trend analysis of potential evapotranspiration over the  
670 Loess Plateau of China during 2011-2100. *Agricultural and Forest Meteorology*, 233,  
671 183-194. <https://doi.org/10.1016/j.agrformet.2016.11.129>.

672 Raz-Yaseef N, Rotenberg E, Yakir D. Effects of spatial variations in soil evaporation  
673 caused by tree shading on water flux partitioning in a semiarid pine forest[J].  
674 *Agricultural and Forest Meteorology*, 2010, 150(3): 454-462.

675 Rohatyn S, Yakir D, Rotenberg E, et al. Limited climate change mitigation potential  
676 through forestation of the vast dryland regions[J]. *Science*, 2022, 377(6613):  
677 1436-1439.

678 Sang L, Zhu G, Xu Y, et al. Effects of Agricultural Large-And Medium-Sized Reservoirs  
679 on Hydrologic Processes in the Arid Shiyang River Basin, Northwest China[J].  
680 *Water Resources Research*, 2023, 59(2): e2022WR033519.



681 Schlesinger W H, Jasechko S. Transpiration in the global water cycle[J]. Agricultural and  
682 Forest Meteorology, 2014, 189: 115-117.

683 Skrzypek G, Mydłowski A, Dogramaci S, et al. Estimation of evaporative loss based on  
684 the stable isotope composition of water using Hydrocalculator[J]. Journal of  
685 Hydrology, 2015, 523: 781-789.

686 Su T, Lu Z Y, Zhou J, et al. Spatial distribution and seasonal variation characteristics of  
687 global atmospheric moisture recycling[J]. 2014.

688 Sun X, Wilcox B P, Zou C B. Evapotranspiration Partitioning in dryland ecosystems: A  
689 global meta-analysis of in situ studies[J]. Journal of Hydrology, 2019, 576: 123-136.

690 Tague CL, Moritz M, Hanan E. The changing water cycle: The eco-hydrologic impacts of  
691 forest density reduction in Mediterranean (seasonally dry) regions. WIREs Water.  
692 2019;e1350. <https://doi.org/10.1002/wat2.1350>

693 Talsma C J, Good S P, Jimenez C, et al. Partitioning of evapotranspiration in remote  
694 sensing-based models[J]. Agricultural and Forest Meteorology, 2018, 260: 131-143.

695 Teo H C, Raghavan S V, He X, et al. Large-Scale Reforestation Can Increase Water Yield  
696 and Reduce Drought Risk for Water-Insecure Regions in the Asia-Pacific[J].  
697 Available at SSRN 3989861.

698 Wang L, Good S P, Caylor K K. Global synthesis of vegetation control on  
699 evapotranspiration partitioning[J]. Geophysical Research Letters, 2014, 41(19):  
700 6753-6757.

701 Wang P, Yamanaka T, Li X Y, et al. Partitioning evapotranspiration in a temperate  
702 grassland ecosystem: Numerical modeling with isotopic tracers[J]. Agricultural and  
703 Forest Meteorology, 2015, 208: 16-31.

704 Wang S, Wang L, Zhang M, et al. Quantifying moisture recycling of a leeward oasis in  
705 arid central Asia using a Bayesian isotopic mixing model[J]. Journal of Hydrology,  
706 2022, 613: 128459.

707 Wei Z, Lee X, Wen X, et al. Evapotranspiration partitioning for three agroecosystems

708 with contrasting moisture conditions: a comparison of an isotope method and a  
709 two-source model calculation[J]. *Agricultural and Forest Meteorology*, 2018, 252:  
710 296-310.

711 Wershaw, R.L., Friedman, I., Heller, S.J., Frank, P.A., 1966. Hydrogen isotope  
712 fractionation of water passing through trees. In: Hobson, G.D. (Ed.), *Advances in*  
713 *OrganicGeochemistry*. Pergamon Press, New York, pp. 55–67.

714 Wyatt, C. J. W., O'Donnell, F. C., & Springer, A. E. (2015). Semi-Arid Aquifer Responses  
715 to Forest Restoration Treatments and Climate Change.*Groundwater*, 53(2), 207–216.

716 Yao Y., Liang S., Li X., Chen J., Liu S., et al. Improving global terrestrial  
717 evapotranspiration estimation using support vector machine by integrating three  
718 process-based algorithms. *Agricultural and Forest Meteorology* 2017, 242, 55-74.  
719 DOI: 10.1016/j.agrformet.2017.04.011.

720 Yao, Y., Liu, S., Shang, K. (2020). Daily MODIS-based Land Surface Evapotranspiration  
721 Dataset of 2019 in Qilian Mountain Area (ETHi-merge V1.0). National Tibetan  
722 Plateau Data Center, 2020. DOI: 10.11888/Meteoro.tpd.270407.

723 Yepez E A, Huxman T E, Ignace D D, et al. Dynamics of transpiration and evaporation  
724 following a moisture pulse in semiarid grassland: A chamber-based isotope method  
725 for partitioning flux components[J]. *Agricultural and Forest Meteorology*, 2005,  
726 132(3-4): 359-376.

727 Yong L, Zhu G, Wan Q, et al. The soil water evaporation process from mountains based  
728 on the stable isotope composition in a headwater basin and northwest China[J].  
729 *Water*, 2020, 12(10): 2711.

730 Zhang M, Wei X. Deforestation, forestation, and water supply[J]. *Science*, 2021,  
731 371(6533): 990-991.

732 Zhang R, Xu X, Liu M, et al. Comparing evapotranspiration characteristics and  
733 environmental controls for three agroforestry ecosystems in a subtropical humid  
734 karst area[J]. *Journal of hydrology*, 2018, 563: 1042-1050.

735 Zhang Y, Gentine P, Luo X, et al. Increasing sensitivity of dryland vegetation greenness  
736 to precipitation due to rising atmospheric CO<sup>2</sup>[J]. Nature communications, 2022,  
737 13(1): 1-9.

738 Zhang Z, Zhu G, Pan H, et al. Quantifying recycled moisture in precipitation in Qilian  
739 Mountains[J]. Sustainability, 2021, 13(23): 12943.

740 Zhu G, Guo H, Qin D, et al. Contribution of recycled moisture to precipitation in the  
741 monsoon marginal zone: Estimate based on stable isotope data[J]. Journal of  
742 Hydrology, 2019, 569: 423-435.

743 Zhu G, Liu Y, Shi P, et al. Stable water isotope monitoring network of different water  
744 bodies in Shiyang River basin, a typical arid river in China[J]. Earth System Science  
745 Data, 2022, 14(8): 3773-3789.

746 Zhu G, Wang L, Liu Y, et al. Snow-melt water: An important water source for *Picea*  
747 *crassifolia* in Qilian Mountains[J]. Journal of Hydrology, 2022, 613: 128441.

748
