# Supplementary material for: Hydrological effects of evapotranspiration in the Qilian Mountains forest belt
Source: Copernicus journal article supplement (doi:10.5194/hess-2022-375), 2023-01-16
Supplement: Supplementary file [file hess-2022-375-RC1-supplement.pdf]

## GENERAL COMMENT

The proposed work try to assess the different contribution to evapotranspiration dynamics in a Spruce forest in a mountainous catchment. It also aims to quantify the contribution of the different evapotranspiration components to the local precipitations or vapor masses.

The topic appears to be quite interesting and deals with actual questions about the functioning of forest ecosystems.

However, there are many weak points that need to be addressed. Also the organization of the paper is often not linear.

Main critical issues:

- The work is dealing with a basin scale experiment on forest dynamics, but only 7 xylem water samples were collected. It does not seem enough to have significant analysis.
- There are no information on the analytical techniques applied and consequently no information on the analytical uncertainties. Also, clear explanation of sampling strategies are missing.
- Since many of the parameters are recalculated, a clear and rigorous analysis of the errors propagation is mandatory. With no information on the errors of the data, it may be that conclusions are derived from values that are potentially not significantly different.
- Referring the last comment for the discussion section, for these two parameters  $\delta p_v$  and  $\delta a_{adv}$  no explanation on how are obtained is provided.

## ABSTRACT

The abstract is generally clear. It states the general context, the objectives, and some results clearly and understandably.

16 - Maybe need some clarifications.

## INTRODUCTION

The introduction explains quite clearly the general context and gives a reasonable overview of the relative state of the art. The cited literature may be increased in some sections and re-organization of some sentences is advisable (see comments by lines).

The last section of the introduction is a bit too much methods-referred and needs a correction (see comments by lines). The general objective should be better stated.

34 to 41 - the text is discussing the importance of the spruce forests system referring to the Qinghai local one. Maybe, here a more general discussion about this ecosystem could be more appropriate.

39 to 41 - This can be better placed in the final part of the introduction. It seems a bit in the middle of the general knowledge section.

45 - May be good to add at least a sentence to clarify why ET, which is connected to climate change, is the right parameter to study in this context.

79 - after "... in central Asia." can reasonable place to insert the previous sentence of lines 39 - 41.

79 to 87 - is too much of a method. Shorter and more on the objectives.

## STUDY AREA

This section potentially needs quite some updates (see the comments by lines).

Is the vegetation of the monitored basin only composed of the spruce forest? Can mentioning the vegetation types and distribution be useful (if feasible)?

89 to 100 - A reference to Fig. 1 is missing. There are many toponyms cited but these are not present in Fig. 1 which makes it quite difficult for readers not familiar with the area to understand the geographical setting of the study area.

104 - Fig. 1 Label are too small. A legend of the color code is non-presented. Why are surface water sampling site if surface water is never addressed in the text?

## MATERIALS AND METHODS

The description of the analytical procedures used for isotope determination is completely missing. Please insert it with accurate specifications of the methodology and the associated analytical errors.

107 to 110 - It seems that the sampling was done only at one point, but multiple points are reported in Fig. 1. Important, isotopic values are not observed but determined in samples, and samples are collected at certain locations, unless the case of "portable" analyzer (like some CRDLS). The sampling strategies need a clearer explanation

117 to 141 - Sections 3.3.1, 3.3.2 and 3.3.3 miss citations. The sources of the reported equations need to be cited.

## RESULTS AND ANALYSIS

Comment to Tab. 1. The number of analyzed xylem water samples seems quite low with respect to other water matrices. This can pose a serious problem with the statistical significance of the results. How can the work deal with this?

Comment to Figure 4b, is it not clear why  $\delta b$  is represented instead of  $\delta ET$ . Does the x-axis represent humidity?

Comments to Figure 5a, how can the two data points for which  $\delta^{18}O_s$  is lower than  $\delta^{18}O_e$  be justified? Which may seem counterintuitive. What is the y-axis representing?

Comment to Figures 5a and 5b. In both figures,  $\delta^{18}O_s$  is represented. Are these the same data? If yes, why are the values different?

Comments to Figure 5c. Some remarkable mistakes are present in this figure. The y-axis is reporting a fraction(0 to 1) value, but the label has the percentage symbol. The y-axis does not have the same interval magnitude. Moreover, see the comment in the pdf on lines 286 to 288

252 - The following is stated " $\delta^{18}\text{O}_X > \delta^{18}\text{O}_{\text{ET}} > \delta^{18}\text{O}_E$ " but from the graph in fig. 4a, it seems that except for the first data point  $\delta^{18}\text{O}_X$  and  $\delta^{18}\text{O}_E$  are more or less equal. A statistical test (like t-test) would probably tell that no significant difference is present between the two sample-populations.

## DISCUSSION

Comments to section 5.1.2, figure 7, and lines 190 to 192. The results expressed in the referred section and figure are based on the following parameters reported in lines 190 to 192 " $\delta_{\text{pv}}$ ,  $\delta_{\text{tr}}$ ,  $\delta_{\text{ev}}$  and  $\delta_{\text{adv}}$  values are the stable isotopes in precipitating transpiration, transpiration, surface evaporation, and advective vapour, respectively". Of these four parameters is never explained how these two  $\delta_{\text{pv}}$  and  $\delta_{\text{adv}}$  are derived or measured. All this section and elaboration is not understandable.

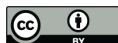

1 Hydrological effects of evapotranspiration in the Qilian Mountains  
2 forest belt

3 Yinying Jiao<sup>1,2</sup>, Guofeng Zhu<sup>1,2\*</sup>, Dongdong Qiu<sup>1,2</sup>, Yuwei Liu<sup>1,2</sup>, Lei Wang<sup>1,2</sup>, Siyu  
4 Lu<sup>1,2</sup>, Gaojia Meng<sup>1,2</sup>, Xinrui Lin<sup>1,2</sup>, Rui Li<sup>1,2</sup>, Qinqin Wang<sup>1,2</sup>, Longhu Chen<sup>1,2</sup>, Niu  
5 Sun<sup>1,2</sup>

6 <sup>1</sup> School of Geography and Environment Science, Northwest Normal University,  
7 Lanzhou 730070, Gansu, China

8 <sup>2</sup> Shiyang River Ecological Environment Observation Station, Northwest Normal  
9 University, Lanzhou 730070, Gansu, China

10 **Abstract:** Mountainous areas are the main water-producing and source areas of rivers.  
11 Global climate change is transforming the distribution of plants and forms of water  
12 use. Therefore, a clear understanding of evapotranspiration in mountainous forest  
13 zone is key for understanding the ecohydrological effect of vegetation and its  
14 influence on the water cycle of the watershed. We quantified the evapotranspiration  
15 processes in the forest belts of the Qilian Mountains as well as their contribution to  
16 runoff yield and concentration based on precipitation, soil water, and plant water  
17 samples and experimental data. The study showed that transpiration of Qinghai spruce  
18 accounted for the highest proportion of evapotranspiration in the entire Qinghai  
19 spruce forest ecosystem, with an average of 79%, which means that transpiration is  
20 much greater than evaporation. Soil water content and air humidity were the dominant  
21 factors influencing evapotranspiration in Qinghai spruce forest belts. The growing  
22 season of Qinghai spruce is characterized by greater evapotranspiration than  
23 precipitation in each month. Consequently, the forest zone does not yield flows in the  
24 eastern part of the Qilian Mountains. The warming of global temperatures and human  
25 activities are likely to trigger shifts in the distribution areas and evapotranspiration  
26 regimes of Qinghai spruce, which in turn will lead to a change in water resource  
27 patterns in the basin.

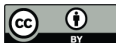

28 **Keywords:** Qinghai spruce; stable isotopes; end-member mixing model;  
29 evapotranspiration partitioning

## 30 1. Introduction

31 Future droughts are likely to be more frequent, more severe, and longer-lasting  
32 than in recent decades. These changes are expected to be most rapid and extreme in  
33 **ecologically fragile areas**, especially in ecosystems in arid and semi-arid regions (Ault  
34 et al., 2020). As a vascular plant species, Qinghai spruce forests are one of the  
35 important entry points for energy and materials **in the environment into terrestrial**  
36 **ecosystems**. Their growth, survival, and reproduction affect other species' ecological  
37 functions and forms within and outside their habitats. There is a high degree of  
38 responsiveness between the vegetation, drought resilience, and microclimatic  
39 conditions of forests and their ecosystems (Eisenhauer et al., 2021). **The spruce forest**  
40 **ecosystem provides various ecological, climatic, and social benefits to the Qilian**  
41 **Mountains but is highly vulnerable to drought and temperature extremes**. More to the  
42 point, climate drivers put spruce forests at risk from drought and heat stress. As the  
43 magnitude of climate change increases, the disturbance to **its** ecosystem is also  
44 expected to be higher. **It** is an important player in climate change mitigation in terms  
45 of climate benefits (Rohatyn et al., 2022). At the ecosystem scale, many studies have  
46 classified evapotranspiration (ET) as transpiration (T) and evapotranspiration (E)  
47 (Schlesinger et al., 2014). Physical evaporation from the soil surface and biological  
48 transpiration (involving soil water uptake by roots and water vapour loss through  
49 plant stomata during photosynthesis) have become bases for classifying ET in field  
50 research. Some studies have classified E and T by measuring the isotopic composition  
51 of oxygen in soil and runoff and concluded that  $\delta^{18}\text{O}$  is enriched by evaporation rather  
52 than transpiration (Wershaw et al., 1966). Dividing evapotranspiration (ET) into soil  
53 evaporation (E) and stomatal plant evapotranspiration (T) is challenging but important  
54 for assessing biomass production and allocating increasingly scarce water resources.  
55 Typically, T is the desired component of water used to enhance plant productivity,  
56 while E is considered a source of water loss or inefficiency. The magnitude of E is



57 expected to be remarkable in sparsely vegetated systems, particularly in arid areas or  
58 very wet systems (e.g., surface irrigated crops and wetlands)(Liu et al., 2015;Zhang et  
59 al., 2018). ET zoning is fundamental for the accurate monitoring of system hydrology  
60 and improved water management practices in these cases (Kool et al.,2014). It is,  
61 therefore, critical to quantify the role of regional evapotranspiration in the terrestrial  
62 water balance and the global water cycle.

63 On the regional and global scales, there are many methods to divide  
64 evapotranspiration. Mainly have (1) river basins, where the role of lateral  
65 groundwater flow in evapotranspiration distribution is investigated by using a  
66 comprehensive continental scale hydrological model, and the vegetation and land  
67 energy processes are coupled with surface and underground hydrology to study the  
68 continental scale evapotranspiration distribution (Maxwell et al.,2016). (2) remote  
69 sensing-based approaches to reveal differences in ET partitioning across models  
70 (Talsma et al., 2018; Chen et al.,2022); (3) the use of eddy covariance methods to  
71 assess multi-year energy fluxes and ET in typical alpine meadows and their  
72 environmental and biophysical controls (Chang et al.,2022), as well as studies that  
73 synthesize all available literature data in an attempt to establish quantitative  
74 relationships between ET allocation and vegetation cover indices (e.g. LAI) for  
75 agricultural and natural systems, and to explain observed changes in T/ET at global  
76 scales (Wang et al., 2014;Wei et al., 2018; Cui et al., 2021).

77 As a water source for several inland rivers, the Qilian Mountains are an  
78 important ecological security barrier and a priority area for biodiversity conservation  
79 in central Asia. We observed and analyzed month-by-month xylem water, soil water,  
80 stable precipitation isotopes, and soil water content of Qinghai spruce forests in the  
81 eastern part of the Qilian Mountains from April to October 2019. The seasonal  
82 variation of water isotopes in different sources of water bodies was first determined,  
83 and the composition and variation of oxygen isotopes in soil evaporation, plant  
84 transpiration, and ecosystem evapotranspiration were analyzed. Later, the  
85 evapotranspiration fluxes were divided into transpiration and evapotranspiration, and



86 then the hydrological effects of evapotranspiration were analysed. This study provides  
87 an effective basis for local water resource use and ecological protection.

## 88 2. Study area

89 The Qilian Mountains are a system of marginal mountains in the northeastern  
90 part of the Qinghai-Tibet Plateau. It lies between 94°E~104°E and 36°N~39°N,  
91 straddling the Qinghai-Gansu provinces, starting from the Dangjinshan Pass in the  
92 west and reaching the Wushaoling in the east, adjacent to the Qaidam Basin, the  
93 Chaka-Gonghe Basin and the Yellow River Valley in the south, and the Hexi Corridor  
94 in the north. The **Shiyang River basin** is located in the east of the Qilian Mountain,  
95 with a high terrain in the south and low terrain in the north, and it slopes from  
96 southwest to northeast. The basin can be divided into four geomorphological units:  
97 the Qilian Mountains in the south, the plains of the central corridor, the low hills in  
98 the north and the desert area (Zhu et al., 2019). The study area is located in the upper  
99 reaches of Xiyang River at an altitude of 2700 m, which is the largest tributary of the  
100 Shiyang River and belongs to the south Qilian Mountains. It is considered an alpine  
101 semiarid and semi-humid zone with annual precipitation of 469.44 mm, annual  
102 evaporation of 700-1200 mm, and an average annual temperature of 3.24°C (Zhu et  
103 al., 2022).

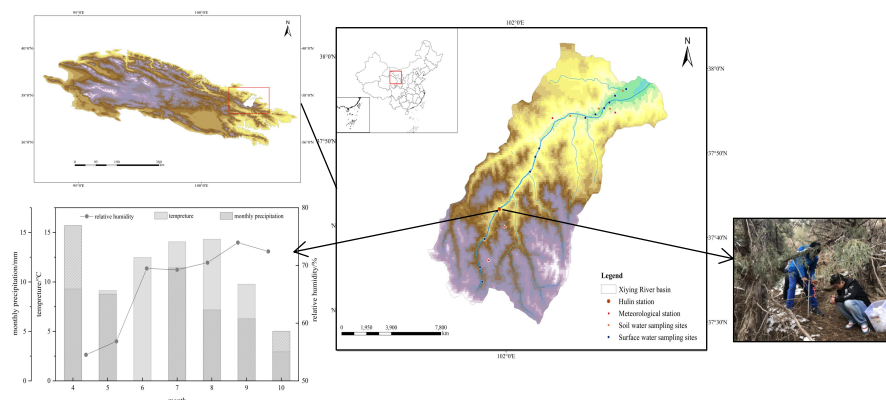

104

Figure 1 Location of the study area and changes in meteorological elements.



### 105 3. Materials and methods

#### 106 3.1 Materials Sources

107 Water isotopes in precipitation, vegetation, and soil water were observed at the  
108 **Xiying River Basin Ranger Station** (101°53'E, 37°41'N; 2721 m asl) from April to  
109 October 2019, and temperature, precipitation, and relative humidity data were  
110 obtained using the station's meteorological recorder. **The monthly potential**  
111 **evapotranspiration data of 1 km in China (1990-2021) with a spatial resolution of**  
112 **0.0083333°** ( **Peng et al.,2022;Ding et al.,2020;Ding et al.,2021** ). The surface  
113 evapotranspiration data were obtained from the MODIS-based daily surface  
114 evapotranspiration data of the Qilian Mountains (2019), with a spatial resolution of  
115 0.01° (Yao et al., 2017;Yao et al., 2020) .

#### 116 3.2 Research methods

##### 117 3.2.1 Isotopic composition of atmospheric water vapour

118 The stable isotope composition of moisture in ambient air is calculated as  
119 follows:

$$120 \delta_A = \frac{\delta_{rain} - k\epsilon^+}{1 + k\alpha^+ \times 10^{-3}} \quad (1)$$

121 where  $k=1$ , or by fitting  $k$  to some fraction of 1 as the best fit to the local  
122 evaporation line, is the isotopic fractionation factor. Defined by  $\epsilon^+ = (\alpha^+ - 1) \times$   
123 1000.  $\alpha^+$  about  $^2\text{H}$  and  $^{18}\text{O}$  are calculated as follows:

$$124 10^3 \ln^2 \alpha^+ = 1158.8T^3/10^9 - 1620.1T^2/10^6 + 794.84T/10^3 - 161.04 +$$
$$125 2.9992 \times 10^9/T^3 \quad (2)$$

126

$$127 10^3 \ln^{18} \alpha^+ = -7.685 + 6.712310^3/T - 1.6664 \times 10^6/T^2 + 0.35041 \times 10^9/$$
$$128 T^3 \quad (3)$$

##### 129 3.3.2 Isotopic composition of soil evaporation

130 The Craig-Gordon model was used to calculate the stable isotopic composition  
131 of soil evaporation water vapour,  $\delta_E$ , using the following equation:



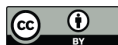

$$\delta_E = \frac{\alpha_e^{-1} \delta_s - h^* \delta_v - \varepsilon_{eq} - (1-h^*) \varepsilon_k}{(1-h^*) + 10^{-3} (1-h^*) \varepsilon_k} \quad (4)$$

132 where  $\alpha_e (>1)$  is the equilibrium factor calculated as a function of water surface  
133 temperature,  $\delta_s$  is the stable isotopic composition of liquid water at the evaporating  
134 surface of the soil (0 ~ 10 cm average stable isotopic composition of soil water),  $\delta_v$  is  
135 the stable isotopic composition of atmospheric water vapour near the surface,  $\varepsilon_{eq}$   
136 represents the equilibrium fractionation corresponding to  $\varepsilon_{eq} = (1-1/\alpha_e) \times 1000$ ,  $\varepsilon_k$  is  
137 the kinetic fractionation factor of  $O_2$  is approximately 18.9‰ and  $h^*$  is the  
138 atmospheric relative humidity. For  $\delta^{18}O$ ,  $\alpha_e$  is calculated as follows.  
139

$$\alpha_e = \frac{1.137 \times 10^6 / T^2 - 0.4156 \times 10^3 / T - 2.0667}{1000} + 1 \quad (5)$$

140 where: T is the soil Kelvin temperature (K) at a depth of 5 cm.  
141

### 142 3.3.3 Isotopic composition of plant transpiration

143 When transpiration is high, plant leaf water is "isotopically stable", i.e. the  
144 isotopic composition of leaf transpiration water is equal to the isotopic composition of  
145 water absorbed by the root system during noon of the rain plant. The plant xylem  
146 water stable isotopic composition can therefore be used to represent the plant  
147 transpiration water vapour stable isotopic composition, i.e:

$$\delta_T = \delta_X \quad (6)$$

148 where  $\delta_X$  is the isotopic ratio of xylem water and  $\delta_T$  is the isotopic ratio of  
149 transpiration.  
150

### 151 3.3.4 Evapotranspiration isotope assessment

152 The Keeling Plot model describes the linear relationship between the oxygen  
153 isotope composition of atmospheric water vapour and its reciprocal  
154 concentration (Keeling et al., 1958). The intercept of the curve on the Y-axis represents  
155 the isotopic composition of evapotranspiration oxygen ( $\delta_{ET}$ ) and is expressed as:

$$\delta_b = \frac{C_a (\delta_a - \delta_{ET})}{C_b} + \delta_{ET} \quad (7)$$

156  
157 Where  $\delta_b$  and  $C_b$  represent the atmospheric water vapour oxygen isotopic  
158 composition (‰) and water vapour concentration in the ecosystem boundary layer,  $\delta_a$   
159 and  $C_a$  represent the background atmospheric water vapour oxygen isotopic



160 composition and background atmospheric water vapour concentration, and  $\delta_{ET}$  is the  
161 ecosystem evapotranspiration oxygen isotopic composition.

### 162 3.3.5 Ecosystem evapotranspiration partitioning

163 The determination of evapotranspiration by means of biotic and abiotic isotopic  
164 water fluxes can be used to improve the understanding of community structure and  
165 ecosystem function in Qinghai spruce forests in the Qilian Mountains. Based on the  
166 isotope mass balance approach to consider the distribution of major and minor  
167 isotopes, the partitioning of evapotranspiration can be achieved using two  
168 end-member mixing models (E and T) with the following expression:

$$169 \frac{T}{ET} = \frac{\delta_{ET} - \delta_E}{\delta_T - \delta_E} \quad (8)$$

170 where  $\delta_{ET}$ ,  $\delta_E$  and  $\delta_T$  are the isotopic compositions of evapotranspiration (ET),  
171 soil evapotranspiration (E) and plant evapotranspiration (T), respectively, and the  
172 isotopic values of the three can be obtained by both direct observation and model  
173 estimation.

174 Their respective contributions can be calculated by the following equations:

$$175 f_E = \frac{\delta_{ET} - \delta_T}{\delta_E - \delta_T} \times 100\% \quad (9)$$

$$176 f_T = \frac{\delta_{ET} - \delta_E}{\delta_T - \delta_E} \times 100\% \quad (10)$$

177

### 178 3.3.6 Three-component mixing model

179 Assuming that the water vapour in precipitation is a mixture of advective water  
180 vapour and recirculating water vapour, it is understood that the proportion of both  
181 precipitation and precipitation water vapour has the same nature. The proportion of  
182 precipitation occupied by circulating water vapour is calculated as follow:

$$183 f_{re} = \frac{P_{tr} + P_{ev}}{P_{tr} + P_{ev} + P_{adv}} \quad (9)$$

184 where  $P_{tr}$ ,  $P_{ev}$  and  $P_{adv}$  are precipitation produced by transpiration, surface evaporation  
185 and advection, respectively.

186 This can be calculated using the following formula:



$$\delta_{pv} = \delta_{tr}f_{tr} + \delta_{ev}f_{ev} + \delta_{adv}f_{adv} \quad (10)$$

$$f_{ev} + f_{tv} + f_{adv} = 1 \quad (11)$$

187 where  $f_{tr}$ ,  $f_{ev}$  and  $f_{adv}$  are the proportional contributions of transpiration, surface  
 190 evaporation and advection to precipitation, respectively, and  $\delta_{pv}$ ,  $\delta_{tr}$ ,  $\delta_{ev}$  and  $\delta_{adv}$  values  
 191 are the stable isotopes in precipitating transpiration, transpiration, surface evaporation  
 192 and advective vapour, respectively.

## 193 4. Results and analysis

### 194 4.1 Hydrogen and oxygen isotope variations in different water

#### 195 bodies

196 The hydrogen and oxygen isotope compositions of different sources of water  
 197 (precipitation, soil water, and plant xylem water) in the study area from April to  
 198 October were selected for comparison with the global atmospheric water line (Fig. 2a).  
 199 It can be seen that the local atmospheric water line is close to the global atmospheric  
 200 water line in terms of linear tilt rate, their linear equations are respectively  
 201  $\delta^2H=7.51\delta^{18}O+10.77$ ,  $R^2=0.97$  and  $\delta^2H=8\delta^{18}O+10$ . Local precipitation  $\delta^{18}O$  values  
 202 varied from -20.30‰ to -0.62‰, with an average value of -7.79‰, and  $\delta^2H$  values  
 203 varied from -137.74‰ to 3.29‰, with an average value of -47.67‰. The hydrogen  
 204 and oxygen isotope values of soil water in each soil layer are mostly distributed below  
 205 the local atmospheric waterline. The range and mean values of  $\delta^{18}O$  variation were  
 206 -8.75‰~-4.35‰, -6.18‰. The range and mean values of  $\delta^2H$  were -58.43‰ to  
 207 -28.26‰ and -42.08‰. This indicates that soil moisture is mainly affected by  
 208 atmospheric precipitation. The soil waterline equation is  $\delta^2H= 6.06\delta^{18}O-4.61$ ,  
 209  $R^2=0.83$ , and its linear tilt and intercept were smaller than LMWL due to slight  
 210 evaporation from the soil. Table 1 shows the water isotope sampling sites of Qinghai  
 211 spruce xylem in the study area, and the water line equation was  $\delta^2H=1.03\delta^{18}O-32.47$ .

212 Table 1 Stable isotope composition of different water bodies.

| Types | $\delta^2H/\%$ |     |         | $\delta^{18}O/\%$ |     |         | Number of Samples |
|-------|----------------|-----|---------|-------------------|-----|---------|-------------------|
|       | max            | min | average | max               | min | average |                   |
|       |                |     |         |                   |     |         |                   |



|               |        |         |        |       |        |        |    |
|---------------|--------|---------|--------|-------|--------|--------|----|
| Soil water    | -4.54  | -58.43  | -31.60 | -4.35 | -52.93 | -16.66 | 41 |
| Xylem water   | -24.12 | -40.53  | -34.42 | 8.45  | -6.72  | -1.90  | 7  |
| Precipitation | 3.29   | -137.74 | -47.67 | -0.62 | -20.30 | -7.79  | 43 |

213 Rainfall in the study area was concentrated during the vegetative growth period  
 214 (Fig. 2b). Both the precipitation amounts and the  $\delta^{18}\text{O}$  values were higher in  
 215 mid-to-late April, reaching a maximum of 27.4 mm on April 28, and lower values in  
 216 May and June compared to other months.  $\delta^{18}\text{O}$  was at a maximum of -0.62‰. It is  
 217 clearly seen that the precipitation  $\delta^{18}\text{O}$  varies from June to October with a trend of  
 218 increasing and then decreasing. The oxygen isotopes of shallow soil water (0 ~ 10cm)  
 219 and xylem water were higher in the middle and late April, which were -4.91 ‰ and  
 220 8.45 ‰, respectively, but fluctuated greatly in the monsoon season. The  $\delta^{18}\text{O}$  of  
 221 shallow soil water peaked in late June with a maximum value of -4.35‰, and the  $\delta^{18}\text{O}$   
 222 maximum of xylem water occurred in late April with a maximum value of 8.45‰.  
 223 Soil water content was higher in August than in May, as was the intensity of soil  
 224 evaporation. In terms of the layer profile, soil water content showed a trend of  
 225 increasing and then decreasing on a vertical gradient in all three months (Fig.3a).

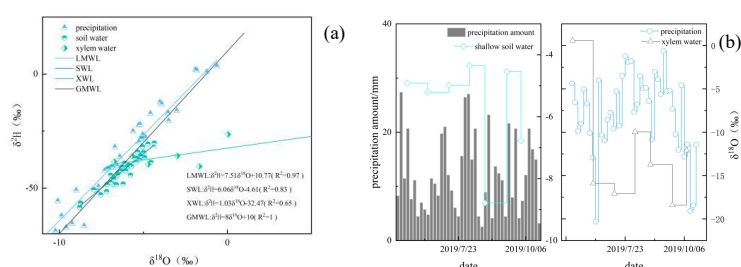

226  
 227 **Figure 2** (a) Hydrogen and oxygen stable isotope linkages, (b) Precipitation and  
 228 oxygen isotope changes in different water bodies.

229 Atmospheric water vapour stable isotopes were calculated based on stable  
 230 precipitation isotopes (Fig. 3b), with an average atmospheric water vapour  $\delta^{18}\text{O}$  of  
 231 -8.15‰, with the smallest initial value of -20.41‰ in May and a maximum value of  
 232 -1.34‰ in late July. The average atmospheric water vapour  $\delta^{2}\text{H}$  was -49.69‰,  
 233 fluctuating from -131.79‰ to 1.59 (Table 1). The average deuterium surplus from



234 April to October is 14.62‰, reaching a maximum value of 30.95‰ in early May,  
235 indicating high atmospheric humidity. After which, the deuterium value falls rapidly  
236 to its lower limit of 1.57‰ in early July. Deuterium values fluctuated slowly from  
237 June to August and began to fluctuate significantly from the middle of August,  
238 indicating that local evaporation was influenced by temperature and relative humidity  
239 over time, which made evaporation gradually stronger and unbalanced evaporation  
240 gradually stronger.

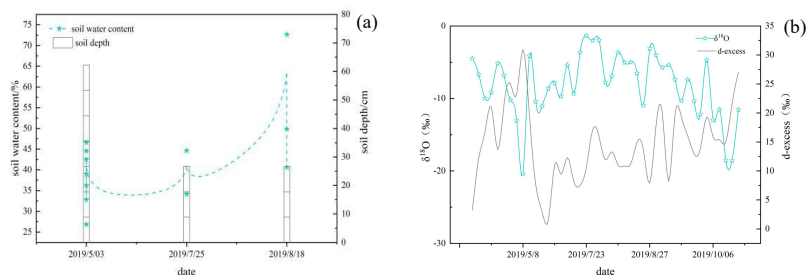

241  
242 Figure 3 (a) Variation in soil water content, (b) Comparison between atmospheric  
243 water vapour oxygen isotopes and d-excess

## 244 4.2 Soil evaporation, plant transpiration and ecosystem 245 evapotranspiration

246 The Craig-Gordon model and the steady-state isotopic assumption were used to  
247 derive the oxygen isotopic composition of soil evaporation and plant transpiration  
248 (Fig. 4a), respectively. The Keeling Plot model method was used to obtain the oxygen  
249 isotopic composition of ecosystem evapotranspiration (Fig. 4b). According to the  
250 results shown in the figure, the changes of oxygen isotope composition in the three  
251 water bodies from April to October were compared. The overall magnitude pattern  
252 was:  $\delta^{18}O_X > \delta^{18}O_{ET} > \delta^{18}O_E$ . The fluctuations of  $\delta^{18}O_X$  and  $\delta^{18}O_E$  were roughly parallel  
253 to each other on the horizontal time axis, but the plant transpiration oxygen isotope  
254 fluctuations were more dramatic than the soil evaporation oxygen isotope  
255 compositions, reaching the lowest values in June and September, respectively. From  
256 April to October, the mean value of soil evaporation oxygen isotope was -121.87‰,  
257 and the mean value of plant transpiration oxygen isotope was -1.90‰. This would

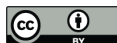

258 suggest that all three are consistently affected by seasonal changes. Compared with  
259 the oxygen isotopic composition of soil evaporation, the isotopic composition of  
260 shallow soil water is shown as follows:  $\delta^{18}\text{O}_S > \delta^{18}\text{O}_E$  (Fig. 5a). It shows that the  
261 fluctuation changes of the two are not consistent, but the  $\delta^{18}\text{O}$  values are decreasing in  
262 general. These results indicated that the isotope fractionation of soil water occurred  
263 during the evaporation process, soil surface liquid water oxygen isotopes were visibly  
264 enriched and conversely, soil evaporation oxygen isotope composition underwent  
265 obvious depletion.

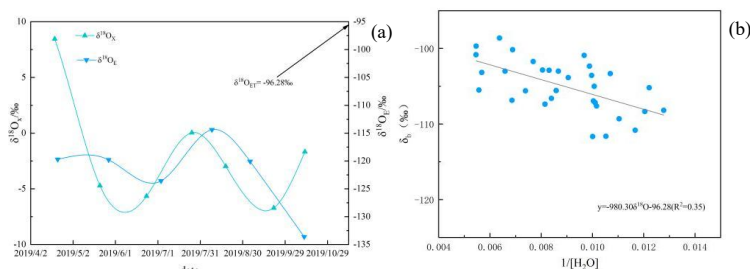

266  
267 Figure 4 Isotopic composition of soil evaporation, plant transpiration and  
268 ecosystem evapotranspiration (a) and (b)

### 269 4.3 T/ET assessment of Qinghai spruce forest ecosystem in different 270 months

271 The contribution of plant transpiration to evapotranspiration (T/ET) from April to  
272 October was calculated, combined with the  $\delta^{18}\text{O}$  values of plant xylem water and  
273 shallow layer (0-10cm) during the same period (Fig. 5b). The T/ET values are  
274 gradually increasing before the onset of summer winds, showing a slight increase in  
275 the range of 0.15 to 0.20. The mean oxygen isotope values of xylem water and  
276 shallow soil water from April to June were respectively 1.87‰ and -4.95‰,  
277 indicating that the response of transpiration to temperature change was higher than  
278 that of shallow soil water evaporation during this period. It directly proved that the  
279 increase in T/ET value is attributed to transpiration. In the summer wind-influenced  
280 season, T/ET fluctuates between 0.15 and 0.25 slightly, and the water-oxygen isotope



281 values of the xylem are generally higher than those of the shallow soil water-oxygen  
282 isotope values from July to August. In this period, the spruce forest was subjected to  
283 good rain and heat conditions, the surface soil layer less inhibited soil evaporation,  
284 and the soil water absorbed by the root area of the forest was more abundant.  
285 Therefore, evaporation and transpiration were more intense in this period, which  
286 showed an obvious transpiration season. From September to October, the T/ET ratio  
287 fluctuated between 0.20 and 0.30, and its average value was greater during this period  
288 compared with the summer wind-influenced period. This represented a strong surface  
289 resistance to soil evaporation when climatic conditions are not favorable, despite the  
290 fact that soil water satisfies transpiration in the root zone, resulting in lower E values  
291 and increased T/ET values. The  $\delta^{18}\text{O}$  values of xylem water and shallow soil water  
292 were  $-4.20\text{‰}$  and  $-5.66\text{‰}$ , respectively, which means that the transpiration of spruce  
293 forest trees was more intense. A month-by-month comparison of the two contributions  
294 to evapotranspiration (Fig. 5c) showed that the plant transpiration contribution  $f_T$   
295 ranged from 0.70% to 0.85% during the study period, while the soil  
296 evapotranspiration contribution only ranged from 0.15% to 0.35%, with the former  
297 significantly higher than the latter in all months.  $f_T$ . From April to October, the mean  
298 value of  $f_T$  was 79%, and the mean value of  $f_E$  was 20%. The mean values of  $f_T$  and  $f_E$   
299 from April to October were 79% and 20%, respectively, indicating that the  
300 evapotranspiration of the Qinghai spruce forest ecosystem was mainly composed of  
301 transpiration from forest trees.

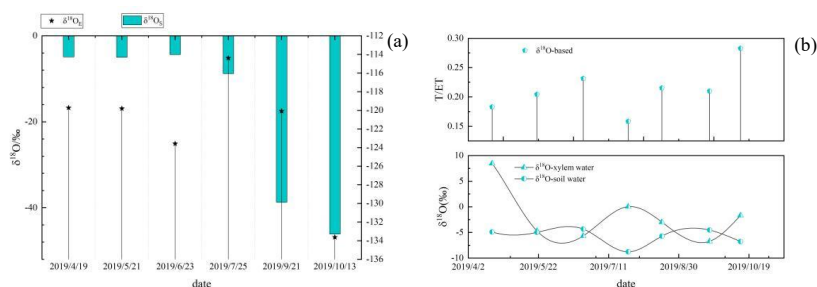

302

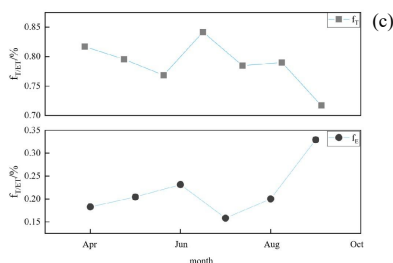

303  
 304 Figure 5 (a) Isotopic composition of water oxygen in shallow soils versus isotopic composition of  
 305 evaporative oxygen in soils, (b) Effect of biotic and abiotic components of ecosystems on  
 306 evapotranspiration in different seasons, (c) Contribution of T and E to evapotranspiration

## 307 5. Discussions

### 308 5.1 Hydrological effects of changes in evapotranspiration

#### 309 5.1.1 Impact on surface runoff

310 Comparing the differences of monthly potential evapotranspiration, surface  
 311 evapotranspiration and precipitation in spruce forests (Table 2), the results clearly  
 312 showed that rainfall fluctuated between 0-16mm, and the maximum rainfall was 15.7  
 313 mm in April, while the minimum value of surface evapotranspiration is 41.8 mm and  
 314 the minimum value of potential evapotranspiration is 44.1mm. The huge difference  
 315 between  $ET_p$  and  $ET$  shows that there is no effective water accumulation in all months.  
 316 From this, an important conclusion can be drawn: surface runoff can not be collected  
 317 in this area, which also proves that afforestation in this area will further enhance  
 318 evapotranspiration, posing a threat to water distribution and utilisation.

319 Table 2 Month-by-month comparison of potential evapotranspiration, surface evapotranspiration  
 320 and rainfall

| Month \ Variable | 4    | 5    | 6     | 7     | 8     | 9    | 10   |
|------------------|------|------|-------|-------|-------|------|------|
| $ET_p$ /mm       | 76.6 | 87.6 | 106.5 | 128.3 | 118.1 | 80.0 | 44.1 |
| $ET$ /mm         | 51.5 | 66.3 | 93.3  | 108.9 | 110.7 | 81.2 | 41.8 |
| $P$ /mm          | 15.7 | 8.8  | 0     | 13.2  | 13.3  | 11.2 | 13.6 |





321

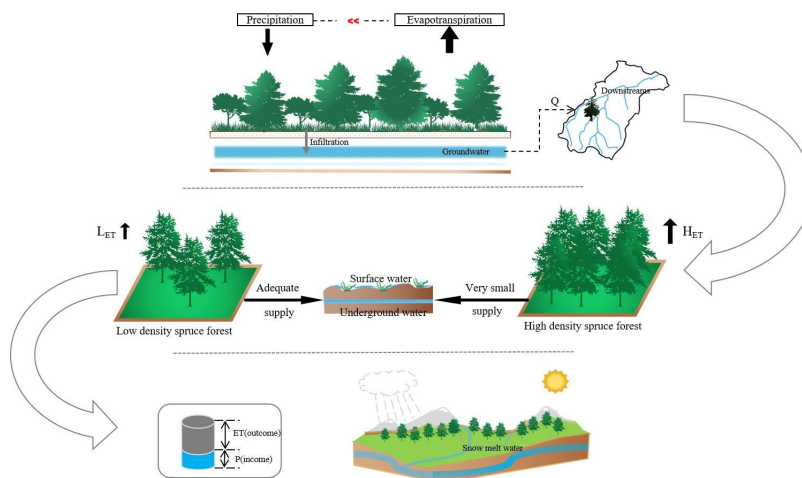

322

323 Figure 6 Conceptual model of the hydrological effects of changes in evapotranspiration

324 Some studies suggested that reducing forest density will result in less ET in  
325 seasonally dry forests. That reduced ET can be converted into increased groundwater  
326 and runoff to supply downstream social water (Wyatt, O'Donnell, & Springer, 2015).  
327 It has also been claimed that in some cases, the transient increase in water availability  
328 through reduced forest density can actually contribute to subsequent increases in  
329 vegetation cover and ultimately reduce runoff (Tague et al., 2019). By assessing the  
330 hydrological effects of afforestation through the water cycle in the Asia-Pacific region,  
331 it was found that in 7 of the 15 water-deficient areas, positive effects such as  
332 increased yield, precipitation, soil moisture and reduced drought risk were achieved  
333 through afforestation, and it was confirmed that the water-water cycle had a strong  
334 impact and EVapotranspiration was increased (Teo et al., 2021). The water vapour  
335 content **consumed** by forest transpiration is much higher than that lost by soil surface  
336 evaporation, most of the precipitation is intercepted and infiltrated by surface  
337 vegetation, and part of the soil water involved in infiltration is absorbed by the root  
338 zone of vegetation(Fig. 6). Because of plants' high interception and evaporation  
339 ability and the absorption of groundwater by root zone, the proportion of transpiration  
340 was significantly higher than that of evaporation(Su et al., 2014). In this case, the



341 groundwater amount decreases gradually with the T value increase. Under the  
342 influence of precipitation loss mainly due to plant transpiration, groundwater yield in  
343 this region decreases greatly, and has no significant contribution to the downstream  
344 water revenue.

### 345 **5.1.2 Contribution to recirculating water vapour in precipitation**

346 In the Qilian Mountains, the contribution of circulating water to precipitation is  
347 often higher in areas above 2400 m above sea level than in the foothills (2100-2400 m  
348 above sea level), and the contribution of transpiration water from plants is also higher  
349 than that of surface evaporation contribution of  $f_{tr}$  moisture to precipitation is higher  
350 in mountainous areas than in  $f_{ev}$ , and the contribution of circulating moisture increases  
351 with increasing altitude (Zhang et al., 2022; Zhang et al., 2021). The proportional  
352 contribution of circulating water vapour (surface evaporation and transpiration water  
353 vapour) to precipitation in Qinghai spruce forests from 2017 to 2019 was assessed  
354 using a three-component model (Fig. 7), and the results showed that the contribution  
355 of plant transpiration water vapour in summer was larger than the values in the other  
356 two seasons, and excluding the contribution of advection water vapour, plant  
357 transpiration water vapour was higher than the contribution of surface evaporation  
358 water vapour, and this result revealed that in eastern Qilian Mountains,  
359 evapotranspiration from spruce forests is the main mode of precipitation consumption  
360 in the local water cycle. The assessment of mountain, oasis and desert areas in inland  
361 river basins in the monsoonal marginal zone found that advective water vapour  
362 contributions consistently dominate precipitation, yet plant transpiration and surface  
363 evaporation are closely related to temperature changes during the local water vapour  
364 cycle (Zhu et al., 2019).



365

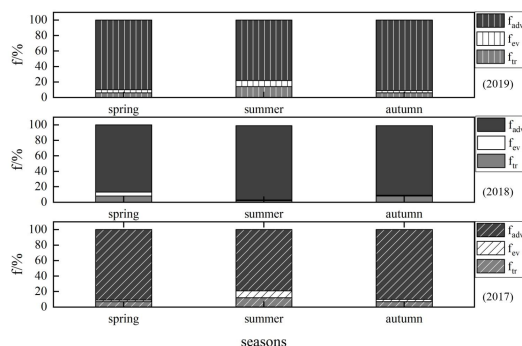

366 Figure 7 Comparison of  $f_{adv}$  (advective water vapour contribution),  $f_{ev}$  (surface evaporation water  
367 vapour contribution) and  $f_{tr}$  (plant transpiration water vapour contribution) for each of the spring,  
368 summer and autumn seasons 2017-2019

### 369 5.1.3 Impact on soil moisture

370 Water stress is an essential factor affecting the growth of spruce forests. Water in  
371 the soil will affect the transpiration of the leaf surface, and too little water will reduce  
372 carbon dioxide, thus reducing photosynthesis. The temporal variation of water content  
373 in the basal layer of Qinghai spruce at an altitude of 2721 m and the temporal  
374 variation of transpiration components in the spruce forest ecosystem during the same  
375 period were matched to reflect the interrelationship between the two. The water  
376 content of the shallow soil layer at 0-10 cm decreased slightly from April to June, then  
377 increased to 49.84% from June to September and decreased slightly from September  
378 to October. The water content of other soil layers in the vertical profile showed  
379 consistent changes with that of the shallow soil layer. Overall, the SWC was higher in  
380 April and May as a result of abundant rainfall and then decreased until June, when it  
381 gradually showed an elevated rate of increase in soil water content from June  
382 onwards.

383 The effect of SWC on T/ET showed some lag in time. Figure 8 reflected that  
384 T/ET changed in an increasing, decreasing, and then increasing trend from April to



385 August, while shallow soil water content showed slight changes from April to June  
386 and gradually grew and then fell from June to September. They show a roughly  
387 parallel correlation with a slight lag. For natural ecosystems, the results of the  
388 intermittent studies showed higher variability than those of the long-term studies. The  
389 range of long-term T/ET variability is narrower, with a mean value of 0.52,  
390 demonstrating that soil evaporation and plant transpiration in natural drylands are  
391 essentially equivalent over the long term. Agroecosystems typically exhibit relatively  
392 high T/ET, and natural and agroecosystems have approximately the same T/ET  
393 maximum(Li et al., 2022; Gao et al., 2018). During dynamic wet and dry processes,  
394 soil evaporation and plant transpiration respond differently in terms of time and  
395 duration. Soil evaporation is more controlled by meteorological processes and shallow  
396 soil moisture, while transpiration is more controlled by plant phenology and water  
397 effectiveness in the root zone(Sun et al., 2019; Li et al., 2014).

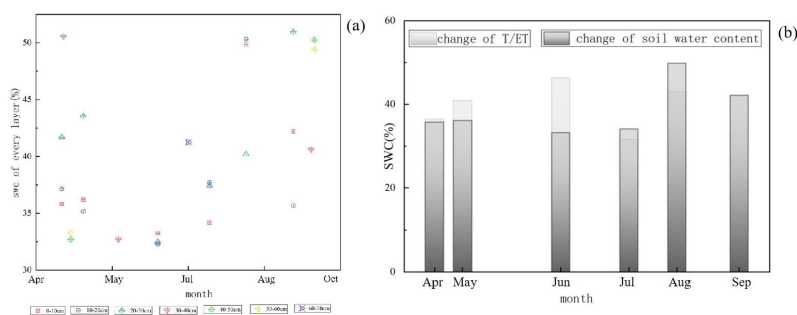

398

399 **Figure 8 Soil water content and ecosystem evapotranspiration**

## 400 **5.2 Impact of climate change on evapotranspiration in Qinghai** 401 **spruce forests**

402 Temperature exerts an influence on vegetation physiological activity through  
403 its effect on moisture and enzyme activity within the vegetation, while relative  
404 humidity also has an immediate bearing on the liquid water isotopic composition  
405 of the soil surface (Fig. 9). Thus, both temperature and relative humidity are  
406 important influences on the partitioning of evapotranspiration. Temperature  
407 generally tends to be higher from April to August, with the monthly mean



408 temperature reaching a six-month maximum in August, rising to 14°C, while the  
409 temperature drops rapidly in the next two months to 3°C, with the temperature  
410 dropping monthly by 6°C in April. Relative humidity increases roughly from  
411 April to June, with slight movements from June to July, before the relative  
412 humidity value fluctuates up to 72.43%, an increase of about 18% compared to  
413 April. Season-wise, the temperature is markedly elevated in the monsoon season,  
414 whereas the relative humidity is greater in the monsoon season than in April and  
415 May and weaker than in September and October. It can be deduced that relative  
416 humidity drives the ecosystem T/ET ratio more sharply during the summer  
417 wind-influenced phase and exhibits a combination of temperature and relative  
418 humidity variability in the other seasons.

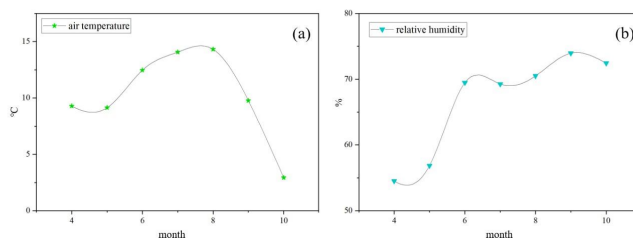

419

420 Figure 9 Variation in temperature and relative humidity

## 421 6. Conclusions

422 This paper utilizes isotope data combined with model simulations to  
423 elucidate the link between evapotranspiration and the local water cycle in the  
424 study area and their hydrological effects. The results showed that July and August  
425 were the peak periods of spruce growth, and the evapotranspiration and  
426 transpiration intensity were both high. Compared with each other, the  
427 transpiration intensity of spruce was higher than that of soil evaporation. Further  
428 specific quantification of plant transpiration and soil evaporation on the  
429 proportion of evapotranspiration results showed that the mean value of  $f_T$  was  
430 79% and the mean value of  $f_E$  was 20%. The contribution of plant transpiration



431 was much higher than that of soil evaporation. The analysis of the hydrological  
432 effects of evapotranspiration in spruce forest belts revealed that  
433 evapotranspiration was greater than precipitation in all months, making it difficult  
434 to develop surface runoff reliant on precipitation. In the context of global  
435 warming, climate drivers may change the ecological communities, ecosystem  
436 functions, and land-climate interactions of spruce forests. Some policies  
437 implemented in China, such as returning farmland to forest, ecological red line  
438 and national park construction, may lead to changes in the distribution region and  
439 area of the Qinghai spruce forest. Therefore, research and assessment of the  
440 ecohydrological implications of forest change in drylands should be continued.

#### 441 **Acknowledgements**

442 This research was financially supported by the National Natural Science  
443 Foundation of China (41867030, 41971036). The authors much thank the colleagues  
444 in the Northwest Normal University for their help in fieldwork, laboratory analysis,  
445 data processing.

#### 446 **Data availability statement**

447 The data that support the findings of this study are available on request from the  
448 corresponding author, stable isotope data are not publicly available due to privacy or  
449 ethical restrictions. Potential evapotranspiration and surface evapotranspiration data  
450 are available from the National Tibetan Plateau Scientific Data Centre (TPDC).

#### 451 **Competing Interests**

452 We undersigned declare that this manuscript entitled “Hydrological effects of  
453 evapotranspiration in the Qilian Mountains forest belt” is original, has not been  
454 published before and is not currently being considered for publication elsewhere.

455 The authors declare that they have no known competing financial interests or



456 personal relationships that could have appeared to influence the work reported in this  
457 paper.

## 458 **References**

- 459 Anderegg W R L, Kane J M, Anderegg L D L. Consequences of widespread tree mortality  
460 triggered by drought and temperature stress[J]. *Nature climate change*, 2013, 3(1):  
461 30-36.
- 462 Ault T R. On the essentials of drought in a changing climate[J]. *Science*, 2020, 368(6488):  
463 256-260.
- 464 Chang Y, Ding Y, Zhang S, et al. Dynamics and environmental controls of  
465 evapotranspiration for typical alpine meadow in the northeastern Tibetan Plateau[J].  
466 *Journal of Hydrology*, 2022, 612: 128282.
- 467 Chen H, Zhu G, Shang S, et al. Uncertainties in partitioning evapotranspiration by two  
468 remote sensing-based models[J]. *Journal of Hydrology*, 2022, 604: 127223.
- 469 Cui Y, Jia L, Fan W. Estimation of actual evapotranspiration and its components in an  
470 irrigated area by integrating the Shuttleworth-Wallace and surface  
471 temperature-vegetation index schemes using the particle swarm optimization  
472 algorithm[J]. *Agricultural and Forest Meteorology*, 2021, 307: 108488.
- 473 Díaz S, Kattge J, Cornelissen J H C, et al. The global spectrum of plant form and  
474 function[J]. *Nature*, 2016, 529(7585): 167-171.
- 475 Ding, Y.X., & Peng, S.Z. (2020). Spatiotemporal trends and attribution of drought across  
476 China from 1901–2100. *Sustainability*, 12(2), 477.
- 477 Ding, Y.X., Peng, S.Z. (2021). Spatiotemporal change and attribution of potential  
478 evapotranspiration over China from 1901 to 2100. *Theoretical and Applied*  
479 *Climatology*. <https://doi.org/10.1007/s00704-021-03625-w>.
- 480 Eisenhauer N, Weigelt A. Ecosystem effects of environmental extremes[J]. *Science*, 2021,  
481 374(6574): 1442-1443.

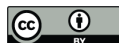

- 482 Gao, C. J. (2018). Regional differences in land-atmosphere coupling and possible impacts  
483 of soil moisture over Eastern China. Nanjing University of Information Science &  
484 Technology (In Chinese).
- 485 Han J, Tian L, Cai Z, et al. Season-specific evapotranspiration partitioning using dual  
486 water isotopes in a Pinus yunnanensis ecosystem, southwest China[J]. Journal of  
487 Hydrology, 2022, 608: 127672.
- 488 Keeling C D. The concentration and isotopic abundances of atmospheric carbon dioxide  
489 in rural areas[J]. Geochimica et cosmochimica acta, 1958, 13(4): 322-334.
- 490 Kool D, Agam N, Lazarovitch N, et al. A review of approaches for evapotranspiration  
491 partitioning[J]. Agricultural and forest meteorology, 2014, 184: 56-70.
- 492 Li Q, Ye A, Zhang Y, et al. The peer-to-peer type propagation from meteorological  
493 drought to soil moisture drought occurs in areas with strong land-atmosphere  
494 interaction[J]. Water Resources Research, e2022WR032846.
- 495 Li X, Liang S, Yuan W, et al. Estimation of evapotranspiration over the terrestrial  
496 ecosystems in China[J]. Ecohydrology, 2014, 7(1): 139-149.
- 497 Liu Y, Zhuang Q, Miralles D, et al. Evapotranspiration in Northern Eurasia: Impact of  
498 forcing uncertainties on terrestrial ecosystem model estimates[J]. Journal of  
499 Geophysical Research: Atmospheres, 2015, 120(7): 2647-2660.
- 500 Maxwell R M, Condon L E. Connections between groundwater flow and transpiration  
501 Partitioning [J]. Science, 2016, 353(6297): 377-380.
- 502 Peng W L, Zhao L J, Xie C, et al. Et segmentation of Picea Qinghai forest ecosystem in  
503 the upper reaches of Heihe River [J]. Journal of Glaciology and Geocryology, 2020,  
504 42(2): 629-640.
- 505 Peng, S. (2022). 1 km monthly potential evapotranspiration dataset in China (1990-2021).  
506 National Tibetan Plateau Data Center, 2022. DOI: 10.11866/db.loess.2021.001.
- 507 Peng, S.Z., Ding, Y.X., Liu, W.Z., & Li, Z. (2019). 1 km monthly temperature and  
508 precipitation dataset for China from 1901 to 2017. Earth System Science Data, 11,



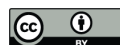

- 509 1931–1946. <https://doi.org/10.5194/essd-11-1931-2019>.
- 510 Peng, S.Z., Ding, Y.X., Wen, Z.M., Chen, Y.M., Cao, Y., & Ren, J.Y. (2017).  
511 Spatiotemporal change and trend analysis of potential evapotranspiration over the  
512 Loess Plateau of China during 2011-2100. *Agricultural and Forest Meteorology*, 233,  
513 183-194. <https://doi.org/10.1016/j.agrformet.2016.11.129>.
- 514 Raz-Yaseef N, Rotenberg E, Yakir D. Effects of spatial variations in soil evaporation  
515 caused by tree shading on water flux partitioning in a semiarid pine forest[J].  
516 *Agricultural and Forest Meteorology*, 2010, 150(3): 454-462.
- 517 Rohatyn S, Yakir D, Rotenberg E, et al. Limited climate change mitigation potential  
518 through forestation of the vast dryland regions[J]. *Science*, 2022, 377(6613):  
519 1436-1439.
- 520 Schlesinger W H, Jasechko S. Transpiration in the global water cycle[J]. *Agricultural and*  
521 *Forest Meteorology*, 2014, 189: 115-117.
- 522 Su T, Lu Z Y, Zhou J, et al. Spatial distribution and seasonal variation characteristics of  
523 global atmospheric moisture recycling[J]. 2014.
- 524 Sun X, Wilcox B P, Zou C B. Evapotranspiration Partitioning in dryland ecosystems: A  
525 global meta-analysis of in situ studies[J]. *Journal of Hydrology*, 2019, 576: 123-136.
- 526 Tague CL, Moritz M, Hanan E. The changing water cycle: The eco-hydrologic impacts of  
527 forest density reduction in Mediterranean (seasonally dry) regions. *WIREs Water*.  
528 2019;e1350. <https://doi.org/10.1002/wat2.1350>
- 529 Talsma C J, Good S P, Jimenez C, et al. Partitioning of evapotranspiration in remote  
530 sensing-based models[J]. *Agricultural and Forest Meteorology*, 2018, 260: 131-143.
- 531 Teo H C, Raghavan S V, He X, et al. Large-Scale Reforestation Can Increase Water Yield  
532 and Reduce Drought Risk for Water-Insecure Regions in the Asia-Pacific[J].  
533 Available at SSRN 3989861.
- 534 Wang L, Good S P, Caylor K K. Global synthesis of vegetation control on  
535 evapotranspiration partitioning[J]. *Geophysical Research Letters*, 2014, 41(19):



- 536 6753-6757.
- 537 Wei Z, Lee X, Wen X, et al. Evapotranspiration partitioning for three agroecosystems  
538 with contrasting moisture conditions: a comparison of an isotope method and a  
539 two-source model calculation[J]. *Agricultural and Forest Meteorology*, 2018, 252:  
540 296-310.
- 541 Wershaw, R.L., Friedman, I., Heller, S.J., Frank, P.A., 1966. Hydrogen isotope  
542 fractionation of water passing through trees. In: Hobson, G.D. (Ed.), *Advances in*  
543 *OrganicGeochemistry*. Pergamon Press, New York, pp. 55–67.
- 544 Wyatt, C. J. W., O'Donnell, F. C., & Springer, A. E. (2015). Semi-Arid Aquifer Responses  
545 to Forest Restoration Treatments and Climate Change.*Groundwater*, 53(2), 207–216.
- 546 Yao Y., Liang S., Li X., Chen J., Liu S., et al. Improving global terrestrial  
547 evapotranspiration estimation using support vector machine by integrating three  
548 process-based algorithms. *Agricultural and Forest Meteorology* 2017, 242, 55-74.  
549 DOI: 10.1016/j.agrformet.2017.04.011.
- 550 Yao, Y., Liu, S., Shang, K. (2020). Daily MODIS-based Land Surface Evapotranspiration  
551 Dataset of 2019 in Qilian Mountain Area (ETHi-merge V1.0). National Tibetan  
552 Plateau Data Center, 2020. DOI: 10.11888/Meteoro.tpdc.270407.
- 553 Yopez E A, Huxman T E, Ignace D D, et al. Dynamics of transpiration and evaporation  
554 following a moisture pulse in semiarid grassland: A chamber-based isotope method  
555 for partitioning flux components[J]. *Agricultural and Forest Meteorology*, 2005,  
556 132(3-4): 359-376.
- 557 Yong L, Zhu G, Wan Q, et al. The soil water evaporation process from mountains based  
558 on the stable isotope composition in a headwater basin and northwest China[J].  
559 *Water*, 2020, 12(10): 2711.
- 560 Zhang R, Xu X, Liu M, et al. Comparing evapotranspiration characteristics and  
561 environmental controls for three agroforestry ecosystems in a subtropical humid  
562 karst area[J]. *Journal of hydrology*, 2018, 563: 1042-1050.

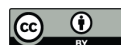

- 563 Zhang Y, Gentine P, Luo X, et al. Increasing sensitivity of dryland vegetation greenness  
564 to precipitation due to rising atmospheric CO<sub>2</sub>[J]. Nature communications, 2022,  
565 13(1): 1-9.
- 566 Zhang Z, Zhu G, Pan H, et al. Quantifying recycled moisture in precipitation in Qilian  
567 Mountains[J]. Sustainability, 2021, 13(23): 12943.
- 568 Zhu G, Guo H, Qin D, et al. Contribution of recycled moisture to precipitation in the  
569 monsoon marginal zone: Estimate based on stable isotope data[J]. Journal of  
570 Hydrology, 2019, 569: 423-435.
- 571 Zhu G, Guo H, Qin D, et al. Contribution of recycled moisture to precipitation in the  
572 monsoon marginal zone: Estimate based on stable isotope data[J]. Journal of  
573 Hydrology, 2019, 569: 423-435.
- 574 Zhu G, Liu Y, Shi P, et al. Stable water isotope monitoring network of different water  
575 bodies in Shiyang River basin, a typical arid river in China[J]. Earth System Science  
576 Data, 2022, 14(8): 3773-3789.
- 577
